# Supplementary material
Source: ML conference proceedings conference paper supplement (https://proceedings.mlr.press/v139/fang21c.html)
Supplement: Supplementary file 1 [file fang21c-supp.pdf]

---

## Appendix: Learning Bounds for Open-Set Learning

---

- Appendix A recalls some important definitions and concepts.
- Appendix B provides the proof for Theorem 1.
- Appendix C provides the proof for Theorem 2.
- Appendix D provides the proof for Theorem 3.
- Appendix E provides the proofs for Theorems 4, 5 and 6.
- Appendix F provides details on datasets and parameter analysis.

## 1. Appendix A: Notations and Concepts

In this section, we introduce the definition of open-set learning and then introduce important concepts used in this paper.

Let  $\mathcal{X} \subset \mathbb{R}^d$  be a feature space and  $\mathcal{Y} := \{\mathbf{y}_c\}_{c=1}^{C+1}$  be the label space, where the label  $\mathbf{y}_c$  is a one-hot vector whose  $c$ -th coordinate is 1 and the other coordinate is 0.

**Definition 1** (Domain, Known and Unknown Classes.). *Given random variable  $X \in \mathcal{X}$  and  $Y \in \mathcal{Y}$ , a domain is a joint distribution  $P_{X,Y}$ . The classes from  $\mathcal{Y}_k := \{\mathbf{y}_c\}_{c=1}^k$  is called known class and  $\mathbf{y}_{C+1}$  is called unknown classes.*

The open set learning problem is defined as follows.

**Problem 1** (Open-Set Learning). *Given independent and identically distributed (i.i.d.) samples  $S = \{(\mathbf{x}^i, \mathbf{y}^i)\}_{i=1}^n$  drawn from  $P_{X,Y|Y \in \mathcal{Y}_k}$ . Aim of open-set learning is to train a classifier using  $S$  such that  $f$  can classify 1) the sample from known classes into correct known classes; 2) the sample from unknown classes into unknown classes.*

Table 1. Main notations and their descriptions.

| Notation                                                                                            | Description                                                                               |
|-----------------------------------------------------------------------------------------------------|-------------------------------------------------------------------------------------------|
| $\mathcal{X}, \mathcal{Y} = \{\mathbf{y}_i\}_{i=1}^{C+1}, \mathcal{Y}_k = \{\mathbf{y}_i\}_{i=1}^k$ | feature space, label space, label space for known classes                                 |
| $X, Y$                                                                                              | random variables on the feature space $\mathcal{X}$ and $\mathcal{Y}$                     |
| $P_{X,Y}, Q_{X,Y}$                                                                                  | joint distributions                                                                       |
| $P_X, Q_X$                                                                                          | marginal distributions                                                                    |
| $P_{X,Y Y \in \mathcal{Y}_k}, Q_{X,Y Y \in \mathcal{Y}_k}$                                          | conditional distributions when label belongs to known classes                             |
| $P_{X Y=\mathbf{y}_{C+1}}, Q_{X Y=\mathbf{y}_{C+1}}$                                                | conditional distributions when label belongs to unknown classes                           |
| $R_P^\alpha, R_Q^\alpha$                                                                            | $\alpha$ -risks corresponding to $P_{X,Y}, Q_{X,Y}$                                       |
| $R_{P,k}, R_{Q,k}$                                                                                  | partial risks for known classes corresponding to $P_{X,Y}, Q_{X,Y}$                       |
| $R_{P,u}, R_{Q,u}$                                                                                  | partial risks for unknown classes corresponding to $P_{X,Y}, Q_{X,Y}$                     |
| $\mathbf{h}$                                                                                        | hypothesis function from $\mathcal{X} \rightarrow \mathbb{R}^{C+1}$                       |
| $\mathcal{H}$                                                                                       | hypothesis space, a subset of $\{\mathbf{h} : \mathcal{X} \rightarrow \mathbb{R}^{C+1}\}$ |
| $\mathcal{H}_K$                                                                                     | RKHS with kernel $K$                                                                      |
| $U$                                                                                                 | auxiliary distribution defined over $\mathcal{X}$                                         |
| $Q_U^{0,\beta} P_{Y X}$                                                                             | ideal auxiliary domain defined over $\mathcal{X} \times \mathcal{Y}$                      |
| $\hat{Q}_U^{\tau,\beta}$                                                                            | the approximation of $Q_U^{0,\beta}$                                                      |
| $w$                                                                                                 | weights                                                                                   |
| $S, T$                                                                                              | samples drawn from $P_{X,Y}$ and $Q_X$ , respectively                                     |
| $n, m$                                                                                              | sizes of samples $S$ and $T$                                                              |
| $d_{\mathbf{h}, \mathcal{H}}^l, \Lambda$                                                            | disparity discrepancy, combined risk                                                      |
| $\hat{R}_{S,T}^{\tau,\beta}, \tilde{R}_{S,T}^{\tau,\beta}$                                          | auxiliary risk, proxy of auxiliary risk                                                   |

**2. Appendix B: Proof of Theorem 1**

*Proof of Theorem. 1.*

$$\begin{aligned}
 & |R_P^\alpha(\mathbf{h}) - R_Q^\alpha(\mathbf{h})| = |(1 - \alpha)R_{P,k}(\mathbf{h}) + \alpha R_{P,u}(\mathbf{h}) - (1 - \alpha)R_{Q,k}(\mathbf{h}) - \alpha R_{Q,u}(\mathbf{h})| \\
 & = |(1 - \alpha) \int_{\mathcal{X} \times \mathcal{Y}_k} \ell(\mathbf{h}(\mathbf{x}), \mathbf{y}) dP_{X,Y|Y \in \mathcal{Y}_k}(\mathbf{x}, \mathbf{y}) + \alpha R_{P,u}(\mathbf{h}) - (1 - \alpha) \int_{\mathcal{X} \times \mathcal{Y}_k} \ell(\mathbf{h}(\mathbf{x}), \mathbf{y}) dQ_{X,Y|Y \in \mathcal{Y}_k}(\mathbf{x}, \mathbf{y}) - \alpha R_{Q,u}(\mathbf{h})| \\
 & = \alpha |R_{P,u}(\mathbf{h}) - R_{Q,u}(\mathbf{h})| \quad \text{we have used } Q_{X,Y|Y \in \mathcal{Y}_k} = P_{X,Y|Y \in \mathcal{Y}_k} \\
 & = \alpha \left| \int_{\mathcal{X}} \ell(\mathbf{h}(\mathbf{x}), \mathbf{y}_{C+1}) dP_{X|Y=\mathbf{y}_{C+1}}(\mathbf{x}) - \int_{\mathcal{X}} \ell(\mathbf{h}(\mathbf{x}), \mathbf{y}_{C+1}) dQ_{X|Y=\mathbf{y}_{C+1}}(\mathbf{x}) \right| \\
 & \leq \alpha \left| \int_{\mathcal{X}} \ell(\mathbf{h}(\mathbf{x}), \mathbf{h}'(\mathbf{x})) dP_{X|Y=\mathbf{y}_{C+1}}(\mathbf{x}) - \int_{\mathcal{X}} \ell(\mathbf{h}(\mathbf{x}), \mathbf{h}'(\mathbf{x})) dQ_{X|Y=\mathbf{y}_{C+1}}(\mathbf{x}) \right| \\
 & \quad + \alpha \int_{\mathcal{X}} \ell(\mathbf{h}'(\mathbf{x}), \mathbf{y}_{C+1}) dP_{X|Y=\mathbf{y}_{C+1}}(\mathbf{x}) + \alpha \int_{\mathcal{X}} \ell(\mathbf{h}'(\mathbf{x}), \mathbf{y}_{C+1}) dQ_{X|Y=\mathbf{y}_{C+1}}(\mathbf{x}) \quad \text{the triangle inequality is used} \\
 & \leq \alpha d_{\mathbf{h}, \mathcal{H}}^\ell(P_{X|Y=\mathbf{y}_{C+1}}, Q_{X|Y=\mathbf{y}_{C+1}}) + \alpha \int_{\mathcal{X}} \ell(\mathbf{h}'(\mathbf{x}), \mathbf{y}_{C+1}) dP_{X|Y=\mathbf{y}_{C+1}}(\mathbf{x}) + \alpha \int_{\mathcal{X}} \ell(\mathbf{h}'(\mathbf{x}), \mathbf{y}_{C+1}) dQ_{X|Y=\mathbf{y}_{C+1}}(\mathbf{x}).
 \end{aligned}$$

Hence,

$$\begin{aligned}
 & |R_P^\alpha(\mathbf{h}) - R_Q^\alpha(\mathbf{h})| = \min_{\mathbf{h}' \in \mathcal{H}} |R_P^\alpha(\mathbf{h}') - R_Q^\alpha(\mathbf{h}')| \quad \text{Note that we minimize } \mathbf{h}', \text{ but not } \mathbf{h} \\
 & \leq \min_{\mathbf{h}' \in \mathcal{H}} (\alpha d_{\mathbf{h}, \mathcal{H}}^\ell(P_{X|Y=\mathbf{y}_{C+1}}, Q_{X|Y=\mathbf{y}_{C+1}}) + \alpha \int_{\mathcal{X}} \ell(\mathbf{h}'(\mathbf{x}), \mathbf{y}_{C+1}) dP_{X|Y=\mathbf{y}_{C+1}}(\mathbf{x}) + \alpha \int_{\mathcal{X}} \ell(\mathbf{h}'(\mathbf{x}), \mathbf{y}_{C+1}) dQ_{X|Y=\mathbf{y}_{C+1}}(\mathbf{x})) \\
 & \leq \alpha d_{\mathbf{h}, \mathcal{H}}^\ell(P_{X|Y=\mathbf{y}_{C+1}}, Q_{X|Y=\mathbf{y}_{C+1}}) + \alpha \Lambda.
 \end{aligned}$$

□

### 3. Appendix C: Proof of Theorem 2

*Proof of Theorem 2. Step 1.* Note that

$$\int_{\mathcal{X} \times \mathcal{Y}} \ell(\phi \circ \tilde{\mathbf{h}}(\mathbf{x}), \phi(\mathbf{y})) dP_{Y|X}(\mathbf{x}) d\tilde{P}(\mathbf{x}) = 0,$$

hence, if we set  $\tilde{P}_{X,Y} = \tilde{P}P_{Y|X}$ , then

$$\int_{\mathcal{X} \times \mathcal{Y}} \ell(\phi \circ \tilde{\mathbf{h}}(\mathbf{x}), \phi(\mathbf{y})) d\tilde{P}_{X,Y|Y \in \mathcal{Y}_k}(\mathbf{x}, \mathbf{y}) = 0, \quad \int_{\mathcal{X}} \ell(\phi \circ \tilde{\mathbf{h}}(\mathbf{x}), \phi(\mathbf{y}_{C+1})) d\tilde{P}_{X|Y=\mathbf{y}_{C+1}}(\mathbf{x}) = 0.$$

Note that  $\ell(\mathbf{y}, \mathbf{y}') = 0$  iff  $\mathbf{y} = \mathbf{y}'$ , hence,  $\tilde{\mathbf{h}}(\mathbf{x}) = \mathbf{y}_{C+1}$ , for  $\mathbf{x} \in \text{supp } \tilde{P}_{X|Y=\mathbf{y}_{C+1}}$  a.e.  $\tilde{P}$  and  $\tilde{\mathbf{h}}(\mathbf{x}) \neq \mathbf{y}_{C+1}$ , for  $\mathbf{x} \in \text{supp } \tilde{P}_{X|Y \in \mathcal{Y}_k}$  a.e.  $\tilde{P}$ .

**Step 2.** Because  $P_X \ll Q_X \ll \tilde{P}$ , then,

$$\text{supp } \tilde{P}_{X|Y \in \mathcal{Y}_k} \supset \text{supp } Q_{X|Y \in \mathcal{Y}_k} \supset \text{supp } P_{X|Y \in \mathcal{Y}_k}$$

and

$$\text{supp } \tilde{P}_{X|Y=\mathbf{y}_{C+1}} \supset \text{supp } Q_{X|Y=\mathbf{y}_{C+1}} \supset \text{supp } P_{X|Y=\mathbf{y}_{C+1}}.$$

**Step 3.** We need to check that  $\min_{\mathbf{h} \in \mathcal{H}} R_P^\alpha(\mathbf{h}) = (1 - \alpha) \min_{\mathbf{h} \in \mathcal{H}} R_{P,k}(\mathbf{h})$ . First, it is clear that  $\min_{\mathbf{h} \in \mathcal{H}} R_P^\alpha(\mathbf{h}) \geq (1 - \alpha) \min_{\mathbf{h} \in \mathcal{H}} R_{P,k}(\mathbf{h})$ . If there exists  $\mathbf{h}_P \in \mathcal{H}$  such that  $\min_{\mathbf{h} \in \mathcal{H}} R_P^\alpha(\mathbf{h}) > (1 - \alpha) \min_{\mathbf{h} \in \mathcal{H}} R_{P,k}(\mathbf{h}_P)$ .

Set

$$\tilde{\mathbf{h}}_P(\mathbf{x}) = \mathbf{y}_{C+1}, \text{ if } \tilde{\mathbf{h}}(\mathbf{x}) = \mathbf{y}_{C+1}; \text{ otherwise, } \tilde{\mathbf{h}}_P(\mathbf{x}) = \mathbf{h}_P(\mathbf{x}),$$

hence, using the results of Step 1 and Step 2, we know  $\{\mathbf{x} : \tilde{\mathbf{h}}(\mathbf{x}) = \mathbf{y}_{C+1}\} \supset \text{supp } P_{X|Y=\mathbf{y}_{C+1}}$ . Then,

$$\begin{aligned} & (1 - \alpha) \int_{\mathcal{X} \times \mathcal{Y}_k} \ell(\mathbf{h}_P(\mathbf{x}), \mathbf{y}) dP_{X,Y|Y \in \mathcal{Y}_k}(\mathbf{x}, \mathbf{y}) \\ &= (1 - \alpha) \int_{\{\text{supp } P_{X|Y \in \mathcal{Y}_k}\} \times \mathcal{Y}_k} \ell(\mathbf{h}_P(\mathbf{x}), \mathbf{y}) dP_{X,Y|Y \in \mathcal{Y}_k}(\mathbf{x}, \mathbf{y}) \\ &= (1 - \alpha) \int_{\{\text{supp } P_{X|Y \in \mathcal{Y}_k}\} \times \mathcal{Y}_k} \ell(\tilde{\mathbf{h}}_P(\mathbf{x}), \mathbf{y}) dP_{X,Y|Y \in \mathcal{Y}_k}(\mathbf{x}, \mathbf{y}) \text{ have used } \tilde{\mathbf{h}}(\mathbf{x}) \neq \mathbf{y}_{C+1}, \text{ for } \mathbf{x} \in \text{supp } \tilde{P}_{X|Y \in \mathcal{Y}_k} \text{ a.e. } \tilde{P} \\ &= (1 - \alpha) \int_{\{\text{supp } P_{X|Y \in \mathcal{Y}_k}\} \times \mathcal{Y}_k} \ell(\tilde{\mathbf{h}}_P(\mathbf{x}), \mathbf{y}) dP_{X,Y|Y \in \mathcal{Y}_k}(\mathbf{x}, \mathbf{y}) + 0 \\ &= (1 - \alpha) \int_{\{\text{supp } P_{X|Y \in \mathcal{Y}_k}\} \times \mathcal{Y}_k} \ell(\tilde{\mathbf{h}}_P(\mathbf{x}), \mathbf{y}) dP_{X,Y|Y \in \mathcal{Y}_k}(\mathbf{x}, \mathbf{y}) + \alpha \int_{\text{supp } P_{X|Y=\mathbf{y}_{C+1}}} \ell(\tilde{\mathbf{h}}_P(\mathbf{x}), \mathbf{y}_{C+1}) dP_{X|Y=\mathbf{y}_{C+1}}(\mathbf{x}) \\ &= (1 - \alpha) \int_{\{\text{supp } P_{X|Y \in \mathcal{Y}_k}\} \times \mathcal{Y}_k} \ell(\tilde{\mathbf{h}}_P(\mathbf{x}), \mathbf{y}) dP_{X,Y|Y \in \mathcal{Y}_k}(\mathbf{x}, \mathbf{y}) + \alpha \int_{\text{supp } P_{X|Y=\mathbf{y}_{C+1}}} \ell(\tilde{\mathbf{h}}_P(\mathbf{x}), \mathbf{y}_{C+1}) dP_{X|Y=\mathbf{y}_{C+1}}(\mathbf{x}) \\ &= R_P^\alpha(\tilde{\mathbf{h}}_P) \geq \min_{\mathbf{h} \in \mathcal{H}} R_P^\alpha(\mathbf{h}), \end{aligned}$$

hence,  $\min_{\mathbf{h} \in \mathcal{H}} R_P^\alpha(\mathbf{h}) = (1 - \alpha) \min_{\mathbf{h} \in \mathcal{H}} R_{P,k}(\mathbf{h})$ . Similarly, we can prove that  $\min_{\mathbf{h} \in \mathcal{H}} R_Q^\alpha(\mathbf{h}) = (1 - \alpha) \min_{\mathbf{h} \in \mathcal{H}} R_{Q,k}(\mathbf{h})$ . Because  $Q_{X|Y \in \mathcal{Y}_k} = P_{X|Y \in \mathcal{Y}_k}$ , hence,  $\min_{\mathbf{h} \in \mathcal{H}} R_{Q,k}(\mathbf{h}) = \min_{\mathbf{h} \in \mathcal{H}} R_{P,k}(\mathbf{h})$ . Using the results of Step 3, we obtain that

$$\min_{\mathbf{h} \in \mathcal{H}} R_Q(\mathbf{h}) = \min_{\mathbf{h} \in \mathcal{H}} R_P(\mathbf{h}). \quad (1)$$

**Step 4.** Given any  $\mathbf{h}^* \in \arg \min_{\mathbf{h} \in \mathcal{H}} R_P^\alpha(\mathbf{h})$ , then we construct  $\tilde{\mathbf{h}}^*$  such that

$$\tilde{\mathbf{h}}^*(\mathbf{x}) = \mathbf{y}_{C+1}, \text{ if } \tilde{\mathbf{h}}(\mathbf{x}) = \mathbf{y}_{C+1}; \text{ otherwise, } \tilde{\mathbf{h}}^*(\mathbf{x}) = \mathbf{h}^*(\mathbf{x}).$$

It is clear that  $\tilde{\mathbf{h}}^* \in \mathcal{H}$  according to Assumption 1.

Then,

$$\begin{aligned}
 & R_P^\alpha(\mathbf{h}^*) \\
 & \geq (1 - \alpha) \int_{\mathcal{X} \times \mathcal{Y}_k} \ell(\mathbf{h}^*(\mathbf{x}), \mathbf{y}) dP_{X,Y|Y \in \mathcal{Y}_k}(\mathbf{x}, \mathbf{y}) \\
 & = (1 - \alpha) \int_{\{\text{supp } P_{X|Y \in \mathcal{Y}_k}\} \times \mathcal{Y}_k} \ell(\mathbf{h}^*(\mathbf{x}), \mathbf{y}) dP_{X,Y|Y \in \mathcal{Y}_k}(\mathbf{x}, \mathbf{y}) \\
 & = (1 - \alpha) \int_{\{\text{supp } P_{X|Y \in \mathcal{Y}_k}\} \times \mathcal{Y}_k} \ell(\tilde{\mathbf{h}}^*(\mathbf{x}), \mathbf{y}) dP_{X,Y|Y \in \mathcal{Y}_k}(\mathbf{x}, \mathbf{y}) \text{ have used } \tilde{\mathbf{h}}(\mathbf{x}) \neq \mathbf{y}_{C+1}, \text{ for } \mathbf{x} \in \text{supp } \tilde{P}_{X|Y \in \mathcal{Y}_k} \text{ a.e. } \tilde{P} \\
 & = (1 - \alpha) \int_{\{\text{supp } P_{X|Y \in \mathcal{Y}_k}\} \times \mathcal{Y}_k} \ell(\tilde{\mathbf{h}}^*(\mathbf{x}), \mathbf{y}) dP_{X,Y|Y \in \mathcal{Y}_k}(\mathbf{x}, \mathbf{y}) + 0 \\
 & = (1 - \alpha) \int_{\{\text{supp } P_{X|Y \in \mathcal{Y}_k}\} \times \mathcal{Y}_k} \ell(\tilde{\mathbf{h}}^*(\mathbf{x}), \mathbf{y}) dP_{X,Y|Y \in \mathcal{Y}_k}(\mathbf{x}, \mathbf{y}) + \alpha \int_{\text{supp } P_{X|Y = \mathbf{y}_{C+1}}} \ell(\tilde{\mathbf{h}}(\mathbf{x}), \mathbf{y}_{C+1}) dP_{X|Y = \mathbf{y}_{C+1}}(\mathbf{x}) \\
 & = (1 - \alpha) \int_{\{\text{supp } P_{X|Y \in \mathcal{Y}_k}\} \times \mathcal{Y}_k} \ell(\tilde{\mathbf{h}}^*(\mathbf{x}), \mathbf{y}) dP_{X,Y|Y \in \mathcal{Y}_k}(\mathbf{x}, \mathbf{y}) + \alpha \int_{\text{supp } P_{X|Y = \mathbf{y}_{C+1}}} \ell(\tilde{\mathbf{h}}^*(\mathbf{x}), \mathbf{y}_{C+1}) dP_{X|Y = \mathbf{y}_{C+1}}(\mathbf{x}) \\
 & = R_P^\alpha(\tilde{\mathbf{h}}^*).
 \end{aligned}$$

Hence, for any  $\mathbf{h}^* \in \arg \min_{\mathbf{h} \in \mathcal{H}} R_P^\alpha(\mathbf{h})$ ,

$$\int_{\mathcal{X}} \ell(\mathbf{h}^*(\mathbf{x}), \mathbf{y}_{C+1}) dP_{X|Y = \mathbf{y}_{C+1}}(\mathbf{x}) = \int_{\text{supp } P_{X|Y = \mathbf{y}_{C+1}}} \ell(\mathbf{h}^*(\mathbf{x}), \mathbf{y}_{C+1}) dP_{X|Y = \mathbf{y}_{C+1}}(\mathbf{x}) = 0.$$

Similarly, we can prove that for any  $\mathbf{h}^* \in \arg \min_{\mathbf{h} \in \mathcal{H}} R_Q^\alpha(\mathbf{h})$ ,

$$\int_{\mathcal{X}} \ell(\mathbf{h}^*(\mathbf{x}), \mathbf{y}_{C+1}) dQ_{X|Y = \mathbf{y}_{C+1}}(\mathbf{x}) = 0.$$

**Step 5.** Given any  $h_Q \in \arg \min_{\mathbf{h} \in \mathcal{H}} R_Q^\alpha(\mathbf{h})$ , we can find that (using result of Step 3)

$$R_Q^\alpha(h_Q) = (1 - \alpha)R_{Q,k}(h_Q) = (1 - \alpha)R_{P,k}(h_Q),$$

and

$$\int_{\mathcal{X}} \ell(h_Q(\mathbf{x}), \mathbf{y}_{C+1}) dQ_{X|Y = \mathbf{y}_{C+1}}(\mathbf{x}) = 0.$$

Because  $P_X \ll Q_X$ , we know

$$P_{X|Y = \mathbf{y}_{C+1}} \ll Q_{X|Y = \mathbf{y}_{C+1}},$$

which implies that

$$\int_{\mathcal{X}} \ell(h_Q(\mathbf{x}), \mathbf{y}_{C+1}) dP_{X|Y = \mathbf{y}_{C+1}}(\mathbf{x}) = 0.$$

Hence,

$$R_Q^\alpha(h_Q) = (1 - \alpha)R_{Q,k}(h_Q) = (1 - \alpha)R_{P,k}(h_Q) + \alpha * 0 = R_P^\alpha(h_Q).$$

Using the result (see Eq. (1)) of Step 3,

$$\min_{\mathbf{h} \in \mathcal{H}} R_Q^\alpha(\mathbf{h}) = \min_{\mathbf{h} \in \mathcal{H}} R_P^\alpha(\mathbf{h}).$$

We obtain that

$$\mathbf{h}_Q \in \arg \min_{\mathbf{h} \in \mathcal{H}} R_P^\alpha(\mathbf{h}),$$

this implies

$$\arg \min_{\mathbf{h} \in \mathcal{H}} R_Q^\alpha(\mathbf{h}) \subset \arg \min_{\mathbf{h} \in \mathcal{H}} R_P^\alpha(\mathbf{h}).$$

□

#### 4. Appendix D: Proof of Theorem 3

**Lemma 1.** For any  $\mathbf{h} \in \mathcal{H}$ ,

$$R_Q^\alpha(\mathbf{h}) = (1 - \alpha)R_{P,k}(\mathbf{h}) + \max\{R_Q(\mathbf{h}, \mathbf{y}_{C+1}) - (1 - \alpha)R_{P,k}(\mathbf{h}, \mathbf{y}_{C+1}), 0\},$$

where  $\alpha = Q(Y = \mathbf{y}_{C+1})$ ,

$$R_Q(\mathbf{h}, \mathbf{y}_{C+1}) = \int_{\mathcal{X}} \ell(\mathbf{h}(\mathbf{x}), \mathbf{y}_{C+1}) dQ_X(\mathbf{x}),$$

and

$$R_{P,k}(\mathbf{h}, \mathbf{y}_{C+1}) = \int_{\mathcal{X}} \ell(\mathbf{h}(\mathbf{x}), \mathbf{y}_{C+1}) dP_{X|Y \in \mathcal{Y}_k}(\mathbf{x}),$$

*Proof. Step 1.* We claim that  $R_Q^\alpha(\mathbf{h}) = (1 - \alpha)R_{P,k}(\mathbf{h}) + \alpha R_{Q,u}(\mathbf{h})$ .

First, it is clear that

$$R_Q^\alpha(\mathbf{h}) = (1 - \alpha)R_{Q,k}(\mathbf{h}) + \alpha R_{Q,u}(\mathbf{h}). \quad (2)$$

Because  $Q_{X,Y|Y \in \mathcal{Y}_k} = P_{X,Y|Y \in \mathcal{Y}_k}$ , hence,

$$\begin{aligned} R_{Q,k}(\mathbf{h}) &= \int_{\mathcal{X} \times \mathcal{Y}_k} \ell(\mathbf{h}(\mathbf{x}), \mathbf{y}) dQ_{X,Y|Y \in \mathcal{Y}_k}(\mathbf{x}, \mathbf{y}) \\ &= \int_{\mathcal{X} \times \mathcal{Y}_k} \ell(\mathbf{h}(\mathbf{x}), \mathbf{y}) dP_{X,Y|Y \in \mathcal{Y}_k}(\mathbf{x}, \mathbf{y}) \\ &= R_{P,k}(\mathbf{h}). \end{aligned} \quad (3)$$

Combining Eq. (2) with Eq. (3), we have that

$$R_Q^\alpha(\mathbf{h}) = (1 - \alpha)R_{P,k}(\mathbf{h}) + \alpha R_{Q,u}(\mathbf{h}).$$

**Step 2.** We claim that  $\alpha R_{Q,u}(\mathbf{h}) = \max\{R_Q(\mathbf{h}, \mathbf{y}_{C+1}) - (1 - \alpha)R_{P,k}(\mathbf{h}, \mathbf{y}_{C+1}), 0\}$ .

First, it is clear that

$$\begin{aligned} R_Q(\mathbf{h}, \mathbf{y}_{C+1}) &= (1 - \alpha) \int_{\mathcal{X}} \ell(\mathbf{h}(\mathbf{x}), \mathbf{y}_{C+1}) dQ_{X|Y \in \mathcal{Y}_k} + \alpha \int_{\mathcal{X}} \ell(\mathbf{h}(\mathbf{x}), \mathbf{y}_{C+1}) dQ_{X|Y = \mathbf{y}_{C+1}} \\ &= (1 - \alpha) \int_{\mathcal{X}} \ell(\mathbf{h}(\mathbf{x}), \mathbf{y}_{C+1}) dP_{X|Y \in \mathcal{Y}_k} + \alpha \int_{\mathcal{X}} \ell(\mathbf{h}(\mathbf{x}), \mathbf{y}_{C+1}) dQ_{X|Y = \mathbf{y}_{C+1}} \\ &= (1 - \alpha)R_{P,k}(\mathbf{h}, \mathbf{y}_{C+1}) + \alpha \int_{\mathcal{X}} \ell(\mathbf{h}(\mathbf{x}), \mathbf{y}_{C+1}) dQ_{X|Y = \mathbf{y}_{C+1}} \\ &= (1 - \alpha)R_{P,k}(\mathbf{h}, \mathbf{y}_{C+1}) + \alpha R_{Q,u}(\mathbf{h}). \end{aligned} \quad (4)$$

Hence,

$$\alpha R_{Q,u}(\mathbf{h}) = R_Q(\mathbf{h}, \mathbf{y}_{C+1}) - (1 - \alpha)R_{P,k}(\mathbf{h}, \mathbf{y}_{C+1}).$$

Because  $\alpha R_{Q,u}(\mathbf{h}) \geq 0$ , we obtain that

$$\alpha R_{Q,u}(\mathbf{h}) = \max\{R_Q(\mathbf{h}, \mathbf{y}_{C+1}) - (1 - \alpha)R_{P,k}(\mathbf{h}, \mathbf{y}_{C+1}), 0\}.$$

**Step 3.** Combining the results of Steps 1 and Steps 2, we have that

$$R_Q^\alpha(\mathbf{h}) = (1 - \alpha)R_{P,k}(\mathbf{h}) + \max\{R_Q(\mathbf{h}, \mathbf{y}_{C+1}) - (1 - \alpha)R_{P,k}(\mathbf{h}, \mathbf{y}_{C+1}), 0\}.$$

□

330 **Lemma 2.** (Kanamori et al., 2009; 2012). Assume the feature space  $\mathcal{X}$  is compact. Let the RKHS  $\mathcal{H}_K$  be the Hilbert space  
 331 with Gaussian kernel. Suppose that the real density  $p/q \in \mathcal{H}_K$  and set the regularization parameter  $\lambda = \lambda_{n,m}$  in KuLSIF  
 332 such that

$$333 \lim_{n,m \rightarrow 0} \lambda_{n,m} = 0, \quad \lambda_{n,m}^{-1} = O(\min\{n, m\}^{1-\delta}),$$

334 where  $0 < \delta < 1$  is any constant, then

$$335 \sqrt{\int_{\mathcal{X}} (\hat{w}(\mathbf{x}) - r(\mathbf{x}))^2 dU(\mathbf{x})} = O_p(\lambda_{n,m}^{\frac{1}{2}}),$$

336 and

$$337 \|\hat{w}\|_{\mathcal{H}_K} = O_p(1),$$

338 where  $\hat{w}$  is the solution of KuLSIF.

339 *Proof.* The result

$$340 \sqrt{\int_{\mathcal{X}} (\hat{w}(\mathbf{x}) - r(\mathbf{x}))^2 dU(\mathbf{x})} = O_p(\lambda_{n,m}^{\frac{1}{2}}),$$

341 can be found in Theorem 1 of (Kanamori et al., 2009) and Theorem 2 of (Kanamori et al., 2012).

342 The result

$$343 \|\hat{w}\|_{\mathcal{H}_K} = O_p(1)$$

344 can be found in the proving process (pages 27-28) of Theorem 1 of (Kanamori et al., 2009) and the proving process (pages  
 345 354-365) of Theorem 2 of (Kanamori et al., 2012).  $\square$

346 Then, we introduce the Rademacher Complexity.

347 **Definition 2** (Rademacher Complexity). Let  $\mathcal{F}$  be a class of real-valued functions defined in a space  $\mathcal{Z}$ . Given a distribution  
 348  $P$  over  $\mathcal{Z}$  and sample  $\tilde{S} = \{z_1, \dots, z_{\tilde{n}}\} \in \mathcal{Z}$  drawn i.i.d. from  $P$ , then the Empirical Rademacher Complexity of  $\mathcal{F}$  with  
 349 respect to the sample  $\tilde{S}$  is

$$350 \hat{\mathfrak{R}}_{\tilde{S}}(\mathcal{F}) := \mathbb{E}_{\sigma} \left[ \sup_{f \in \mathcal{F}} \frac{1}{\tilde{n}} \sum_{i=1}^{\tilde{n}} \sigma_i f(z_i) \right], \quad (5)$$

351 where  $\sigma = (\sigma_1, \dots, \sigma_{\tilde{n}})$  are Rademacher variables, with  $\sigma_i$ s independent uniform random variables taking values in  $-1, +1$ .

352 Then the Rademacher complexity

$$353 \mathfrak{R}_{\tilde{n}, P}(\mathcal{F}) := \mathbb{E}_{\tilde{S} \sim P^{\tilde{n}}} \hat{\mathfrak{R}}_{\tilde{S}}(\mathcal{F}). \quad (6)$$

354 With the Rademacher complexity, we have

355 **Lemma 3.** (Theorem 26.5 in (Shalev-Shwartz & Ben-David, 2014).) Given a space  $\mathcal{Z}$ , a function  $l : R \times \mathcal{Z} \rightarrow \mathbb{R}_+$  and a  
 356 hypothesis set  $\mathcal{H} \subset \{f : \mathcal{Z} \rightarrow R\}$ , let

$$357 \mathcal{F} := l \circ \mathcal{H} = \{l(f(z), z) : f \in \mathcal{H}\},$$

358 where  $l \leq B$ . Then for a distribution  $P$  on space  $\mathcal{Z}$ , data  $\tilde{S} = \{z_1, \dots, z_{\tilde{n}}\} \sim P$  i.i.d, we have with a probability of at least  
 359  $1 - \delta > 0$ , for all  $f \in \mathcal{F}$ :

$$360 \hat{R}(f) - R(f) \leq 2\hat{\mathfrak{R}}_{\tilde{S}}(\mathcal{F}) + 4B\sqrt{\frac{2\log(4/\delta)}{\tilde{n}}}, \quad (7)$$

361 where  $R(f) := \int_{\mathcal{Z}} l(f(z), z) dQ(z)$  and  $\hat{R}(f) := \frac{1}{\tilde{n}} \sum_{i=1}^{\tilde{n}} l(f(z_i), z_i)$ .

362 Using the same technique as in Lemma 3, we have with a probability of at least  $1 - 2\delta > 0$ , for all  $f \in \mathcal{F}$ :

$$363 |R(f) - \hat{R}(f)| \leq 2\hat{\mathfrak{R}}_{\tilde{S}}(\mathcal{F}) + 4B\sqrt{\frac{2\log(4/\delta)}{\tilde{n}}}. \quad (8)$$

364

**Definition 3** (Shattering (Shalev-Shwartz & Ben-David, 2014)). Given a feature space  $\mathcal{X}$ , we say that a set  $U \subset \mathcal{X}$  is shattered by  $\mathcal{H}$  if there exist two functions  $\mathbf{h}_0, \mathbf{h}_1 : U \rightarrow \mathcal{Y}$ , such that

- For every  $\mathbf{x} \in U$ ,  $\mathbf{h}_0(\mathbf{x}) \neq \mathbf{h}_1(\mathbf{x})$ .
- For every  $V \subset U$ , there exists a function  $\mathbf{h} \in \mathcal{H}$  such that  $\forall \mathbf{x} \in V, \mathbf{h}(\mathbf{x}) = \mathbf{h}_0(\mathbf{x})$  and  $\forall \mathbf{x} \in U \setminus V, \mathbf{h}(\mathbf{x}) = \mathbf{h}_1(\mathbf{x})$ .

Hence, we can define the Natarajan dimension as follows.

**Definition 4** (Natarajan Dimension (Shalev-Shwartz & Ben-David, 2014)). The Natarajan dimension of  $\mathcal{H}$ , denoted  $\text{Ndim}(\mathcal{H})$ , is the maximal size of a shattered set  $U \subset \mathcal{X}$ .

It is not difficult to see that in the case that there are exactly two classes,  $\text{Ndim}(\mathcal{H}) = \text{VCdim}(\mathcal{H})$ . Therefore, the Natarajan dimension generalizes the VC dimension.

**Lemma 4.** Assume that  $\mathcal{H} \subset \{\mathbf{h} : \mathcal{X} \rightarrow \mathcal{Y}\}$  has finite Natarajan dimension and the loss function  $\ell$  has upper bound  $c$ , then for any  $0 < \delta < 1$ ,

$$\sup_{\mathbf{h} \in \mathcal{H}} |R_{P,k}(\mathbf{h}) - \widehat{R}_S(\mathbf{h})| = cO_p(1/n^{\frac{1-\delta}{2}}), \quad \sup_{\mathbf{h} \in \mathcal{H}} |R_{P,k}(\mathbf{h}, \mathbf{y}_{C+1}) - \widehat{R}_S(\mathbf{h}, \mathbf{y}_{C+1})| = cO_p(1/n^{\frac{1-\delta}{2}}),$$

where

$$\widehat{R}_S(\mathbf{h}) := \frac{1}{n} \sum_{(\mathbf{x}, \mathbf{y}) \in S} \ell(\mathbf{h}(\mathbf{x}), \mathbf{y}), \quad \widehat{R}_S(\mathbf{h}, \mathbf{y}_{C+1}) := \frac{1}{n} \sum_{(\mathbf{x}, \mathbf{y}) \in S} \ell(\mathbf{h}(\mathbf{x}), \mathbf{y}_{C+1}).$$

*Proof.* Assume that the Natarajan dimension is  $d$  and the upper bound of  $\ell$  is  $B$ .

Let  $\mathcal{F} = \{\ell(\mathbf{h}(\mathbf{x}), \mathbf{y}) : \mathbf{h} \in \mathcal{H}\}$ . Then the Natarajan lemma (Lemma 29.4 of (Shalev-Shwartz & Ben-David, 2014)) tells us that

$$|\{\mathbf{h}(\mathbf{x}^1), \dots, \mathbf{h}(\mathbf{x}^n) | \mathbf{h} \in \mathcal{H}\}| \leq n^d (C+1)^{2d}.$$

Denote  $A = \{(\ell(\mathbf{h}(\mathbf{x}^1), \mathbf{h}'(\mathbf{x}^1)), \dots, \ell(\mathbf{h}(\mathbf{x}^n), \mathbf{h}'(\mathbf{x}^n))) | \mathbf{h}, \mathbf{h}' \in \mathcal{H}\}$ . This clearly implies that

$$|A| \leq |\{\mathbf{h}(\mathbf{x}^1), \dots, \mathbf{h}(\mathbf{x}^n) | \mathbf{h} \in \mathcal{H}\}|^2 \leq (n)^{2d} (C+1)^{4d}.$$

Combining above inequality with Lemma 26.8 of (Shalev-Shwartz & Ben-David, 2014) and inequality (8), we obtain with a probability of at least  $1 - 2\delta > 0$ ,

$$\sup_{\mathbf{h} \in \mathcal{H}} |R_{P,k}(\mathbf{h}) - \widehat{R}_S(\mathbf{h})| \leq 2\widehat{\mathfrak{R}}_S(\mathcal{F}) + 4c\sqrt{\frac{2\log \frac{4}{\delta}}{n}} \leq 2c\sqrt{\frac{4d\log n + 8d\log(C+1)}{n}} + 4c\sqrt{\frac{2\log \frac{4}{\delta}}{n}},$$

hence,

$$\sup_{\mathbf{h} \in \mathcal{H}} |R_{P,k}(\mathbf{h}) - \widehat{R}_S(\mathbf{h})| = cO_p(1/n^{\frac{1-\delta}{2}}).$$

Using the same technique, we can also prove that  $\sup_{\mathbf{h} \in \mathcal{H}} |R_{P,k}(\mathbf{h}, \mathbf{y}_{C+1}) - \widehat{R}_S(\mathbf{h}, \mathbf{y}_{C+1})| = cO_p(1/n^{\frac{1-\delta}{2}})$ .  $\square$

**Lemma 5.** Assume the feature space  $\mathcal{X}$  is compact and the loss function has an upper bound  $c$ . Let the RKHS  $\mathcal{H}_K$  is the Hilbert space with Gaussian kernel. Suppose that the real density  $p/q \in \mathcal{H}_K$  and set the regularization parameter  $\lambda = \lambda_{n,m}$  in KuLSIF such that

$$\lim_{n,m \rightarrow 0} \lambda_{n,m} = 0, \quad \lambda_{n,m}^{-1} = O(\min\{n, m\}^{1-\delta}),$$

where  $0 < \delta < 1$  is any constant, then

$$\sup_{\mathbf{h} \in \mathcal{H}} |R_Q(\mathbf{h}, \mathbf{y}_{C+1}) - \gamma \widehat{R}_T^{\tau, \beta}(\mathbf{h}, \mathbf{y}_{C+1})| \leq \gamma \beta c U(\{\mathbf{x} : 0 < r(\mathbf{x}) \leq 2\tau\}) + c(\max\{1, \frac{\beta}{\tau}\} + \beta) O_p(\lambda_{n,m}^{\frac{1}{2}}),$$

where

$$R_Q(\mathbf{h}, \mathbf{y}_{C+1}) = \int_{\mathcal{X}} \ell(\mathbf{h}(\mathbf{x}), \mathbf{y}_{C+1}) dQ_X(\mathbf{x}), \quad \widehat{R}_T^{\tau, \beta}(\mathbf{h}, \mathbf{y}_{K+1}) := \frac{1}{m} \sum_{\mathbf{x} \in T} L_{\tau, \beta}(\widehat{w}(\mathbf{x})) \ell(\mathbf{h}(\mathbf{x}), \mathbf{y}_{K+1}),$$

here  $Q_X := Q_U^{0, \beta}$ , and  $\widehat{w}$  is the solution of KuLSIF.



*Proof. Step 1.* We claim that

$$\sup_{\mathbf{h} \in \mathcal{H}} |R_Q(\mathbf{h}, \mathbf{y}_{C+1}) - \gamma R_U^{\tau, \beta}(\mathbf{h}, \mathbf{y}_{C+1})| \leq \gamma \beta c U(\{\mathbf{x} : 0 < r(\mathbf{x}) \leq 2\tau\}),$$

where

$$R_U^{\tau, \beta}(\mathbf{h}, \mathbf{y}_{C+1}) = \int_{\mathcal{X}} L_{\tau, \beta}(r(\mathbf{x})) \ell(\mathbf{h}(\mathbf{x}), \mathbf{y}_{C+1}) dU(\mathbf{x}),$$

here  $r(\mathbf{x}) = p(\mathbf{x})/q(\mathbf{x})$ .

First, we note that

$$\begin{aligned} & \left| \int_{\mathcal{X}} L_{0, \beta}(r(\mathbf{x})) \ell(\mathbf{h}(\mathbf{x}), \mathbf{y}_{C+1}) dU(\mathbf{x}) - \int_{\mathcal{X}} L_{\tau, \beta}(r(\mathbf{x})) \ell(\mathbf{h}(\mathbf{x}), \mathbf{y}_{C+1}) dU(\mathbf{x}) \right| \\ & \leq \left| \int_{\mathcal{X}} L_{0, \beta}(r(\mathbf{x})) \ell(\mathbf{h}(\mathbf{x}), \mathbf{y}_{C+1}) dU(\mathbf{x}) - \int_{\mathcal{X}} L_{\tau, \beta}(r(\mathbf{x})) \ell(\mathbf{h}(\mathbf{x}), \mathbf{y}_{C+1}) dU(\mathbf{x}) \right| \\ & \leq c \int_{\mathcal{X}} |L_{0, \beta}(r(\mathbf{x})) - L_{\tau, \beta}(r(\mathbf{x}))| dU(\mathbf{x}) \\ & \leq c \int_{\{\mathbf{x} : 0 < r(\mathbf{x}) \leq 2\tau\}} \beta dU(\mathbf{x}) = \beta c U(\{\mathbf{x} : 0 < r(\mathbf{x}) \leq 2\tau\}). \end{aligned} \tag{9}$$

Because  $Q_{X, Y} = Q_U^{0, \beta} P_{Y|X}$ , then according to the definition of  $Q_U^{0, \beta}$ , we know

$$R_Q(\mathbf{h}, \mathbf{y}_{C+1}) = \gamma \int_{\mathcal{X}} L_{0, \beta}(r(\mathbf{x})) \ell(\mathbf{h}(\mathbf{x}), \mathbf{y}_{C+1}) dU(\mathbf{x}),$$

which implies

$$\sup_{\mathbf{h} \in \mathcal{H}} |R_Q(\mathbf{h}, \mathbf{y}_{C+1}) - \gamma R_U^{\tau, \beta}(\mathbf{h}, \mathbf{y}_{C+1})| \leq \gamma \beta c U(\{\mathbf{x} : 0 < r(\mathbf{x}) \leq 2\tau\}).$$

**Step 2.** We claim that

$$\sup_{\mathbf{h} \in \mathcal{H}} |R_U^{\tau, \beta}(\mathbf{h}, \mathbf{y}_{C+1}) - \int_{\mathcal{X}} L_{\tau, \beta}(\widehat{w}(\mathbf{x})) \ell(\mathbf{h}(\mathbf{x}), \mathbf{y}_{C+1}) dU(\mathbf{x})| \leq \max\{c, \frac{c\beta}{\tau}\} O_p(\lambda_{n, m}^{\frac{1}{2}}).$$

First, the Lipschitz constant for  $L_{\tau, \beta}$  is smaller than  $\max\{1, \frac{\beta}{\tau}\}$ .

Then,

$$\begin{aligned} & \sup_{\mathbf{h} \in \mathcal{H}} |R_U^{\tau, \beta}(\mathbf{h}, \mathbf{y}_{C+1}) - \int_{\mathcal{X}} L_{\tau, \beta}(\widehat{w}(\mathbf{x})) \ell(\mathbf{h}(\mathbf{x}), \mathbf{y}_{C+1}) dU(\mathbf{x})| \\ & = \sup_{\mathbf{h} \in \mathcal{H}} \left| \int_{\mathcal{X}} L_{\tau, \beta}(r(\mathbf{x})) \ell(\mathbf{h}(\mathbf{x}), \mathbf{y}_{C+1}) dU(\mathbf{x}) - \int_{\mathcal{X}} L_{\tau, \beta}(\widehat{w}(\mathbf{x})) \ell(\mathbf{h}(\mathbf{x}), \mathbf{y}_{C+1}) dU(\mathbf{x}) \right| \\ & \leq \sup_{\mathbf{h} \in \mathcal{H}} \int_{\mathcal{X}} |L_{\tau, \beta}(r(\mathbf{x})) - L_{\tau, \beta}(\widehat{w}(\mathbf{x}))| \ell(\mathbf{h}(\mathbf{x}), \mathbf{y}_{C+1}) dU(\mathbf{x}) \\ & \leq \sup_{\mathbf{h} \in \mathcal{H}} \sqrt{\int_{\mathcal{X}} |L_{\tau, \beta}(r(\mathbf{x})) - L_{\tau, \beta}(\widehat{w}(\mathbf{x}))|^2 dU(\mathbf{x})} \sqrt{\int_{\mathcal{X}} \ell^2(\mathbf{h}(\mathbf{x}), \mathbf{y}_{C+1}) dU(\mathbf{x})} \quad \text{Hölder Inequality} \\ & \leq c \sup_{\mathbf{h} \in \mathcal{H}} \sqrt{\int_{\mathcal{X}} |L_{\tau, \beta}(r(\mathbf{x})) - L_{\tau, \beta}(\widehat{w}(\mathbf{x}))|^2 dU(\mathbf{x})} \\ & \leq \max\{c, \frac{c\beta}{\tau}\} \sup_{\mathbf{h} \in \mathcal{H}} \sqrt{\int_{\mathcal{X}} |r(\mathbf{x}) - \widehat{w}(\mathbf{x})|^2 dU(\mathbf{x})}. \end{aligned}$$

Lastly, using Lemma 2,

$$\sup_{\mathbf{h} \in \mathcal{H}} |R_U^{\tau, \beta}(\mathbf{h}, \mathbf{y}_{C+1}) - \int_{\mathcal{X}} L_{\tau, \beta}(\widehat{w}(\mathbf{x})) \ell(\mathbf{h}(\mathbf{x}), \mathbf{y}_{C+1}) dU(\mathbf{x})| \leq \max\{c, \frac{c\beta}{\tau}\} O_p(\lambda_{n, m}^{\frac{1}{2}}).$$

Step 3. We claim that

$$\sup_{\mathbf{h} \in \mathcal{H}} \left| \frac{1}{m} \sum_{\mathbf{x} \in T} L_{\tau, \beta}(\widehat{w}(\mathbf{x})) \ell(\mathbf{h}(\mathbf{x}), \mathbf{y}_{C+1}) - \int_{\mathcal{X}} L_{\tau, \beta}(\widehat{w}(\mathbf{x})) \ell(\mathbf{h}(\mathbf{x}), \mathbf{y}_{C+1}) dU(\mathbf{x}) \right| \leq c \left( \max\left\{1, \frac{\beta}{\tau}\right\} + \beta \right) O_p\left(\lambda_{\widehat{n}, m}^{\frac{1}{2}}\right).$$

First, we set  $\mathcal{F}_B := \{L_{\tau, \beta}(w) \ell(\mathbf{h}, \mathbf{y}_{C+1}) : w \in \mathcal{H}_K, \|w\|_K \leq B, \mathbf{h} \in \mathcal{H}\}$ . We consider

$$\sup_{f \in \mathcal{F}_B} \left| \frac{1}{m} \sum_{\mathbf{x} \in T} f(\mathbf{x}) - \int_{\mathcal{X}} f(\mathbf{x}) dU(\mathbf{x}) \right|$$

Using Lemma 3 and inequality 8, it is easy to check that for  $1 - 2\delta > 0$ , we have

$$\sup_{f \in \mathcal{F}_B} \left| \frac{1}{m} \sum_{\mathbf{x} \in T} f(\mathbf{x}) - \int_{\mathcal{X}} f(\mathbf{x}) dU(\mathbf{x}) \right| \leq 2\widehat{\mathfrak{R}}_T(\mathcal{F}_B) + 4(B + \beta)c\sqrt{\frac{2 \log(4/\delta)}{m}}, \quad (10)$$

here we have used  $|f| \leq (B + \beta)c$ , for any  $f \in \mathcal{F}_B$ .

Then, we consider  $\widehat{\mathfrak{R}}_T(\mathcal{F}_B)$ .

$$\begin{aligned} & m\widehat{\mathfrak{R}}_T(\mathcal{F}_B) \\ &= \mathbb{E}_{\sigma} \left[ \sup_{\|w\|_K \leq B, \mathbf{h} \in \mathcal{H}} \sum_{i=1}^m \sigma_i L_{\tau, \beta}(w_i) \ell(\mathbf{h}_i, \mathbf{y}_{C+1}) \right] \\ &= \mathbb{E}_{\sigma} \left[ \sup_{\|w\|_K \leq B, \mathbf{h} \in \mathcal{H}} \sigma_1 L_{\tau, \beta}(w_1) \ell(\mathbf{h}_1, \mathbf{y}_{C+1}) + \sum_{i=2}^m \sigma_i L_{\tau, \beta}(w_i) \ell(\mathbf{h}_i, \mathbf{y}_{C+1}) \right] \\ &= \frac{1}{2} \mathbb{E}_{\sigma_2, \dots, \sigma_m} \left[ \sup_{\|w\|_K \leq B, \mathbf{h} \in \mathcal{H}} L_{\tau, \beta}(w_1) \ell(\mathbf{h}_1, \mathbf{y}_{C+1}) + \sum_{i=2}^m \sigma_i L_{\tau, \beta}(w_i) \ell(\mathbf{h}_i, \mathbf{y}_{C+1}) \right. \\ & \quad \left. + \sup_{\|w\|_K \leq B, \mathbf{h} \in \mathcal{H}} -L_{\tau, \beta}(w_1) \ell(\mathbf{h}_1, \mathbf{y}_{C+1}) + \sum_{i=2}^m \sigma_i L_{\tau, \beta}(w_i) \ell(\mathbf{h}_i, \mathbf{y}_{C+1}) \right] \\ &= \frac{1}{2} \mathbb{E}_{\sigma_2, \dots, \sigma_m} \left[ \sup_{\|w\|_K \leq B, \mathbf{h} \in \mathcal{H}} \sup_{\|w'\|_K \leq B, \mathbf{h}' \in \mathcal{H}} L_{\tau, \beta}(w_1) \ell(\mathbf{h}_1, \mathbf{y}_{C+1}) + \sum_{i=2}^m \sigma_i L_{\tau, \beta}(w_i) \ell(\mathbf{h}_i, \mathbf{y}_{C+1}) \right. \\ & \quad \left. - L_{\tau, \beta}(w'_1) \ell(\mathbf{h}'_1, \mathbf{y}_{C+1}) + \sum_{i=2}^m \sigma_i L_{\tau, \beta}(w'_i) \ell(\mathbf{h}'_i, \mathbf{y}_{C+1}) \right] \\ &\leq \frac{1}{2} \mathbb{E}_{\sigma_2, \dots, \sigma_m} \left[ \sup_{\|w\|_K \leq B, \mathbf{h} \in \mathcal{H}} \sup_{\|w'\|_K \leq B, \mathbf{h}' \in \mathcal{H}} |L_{\tau, \beta}(w_1) - L_{\tau, \beta}(w'_1)| \ell(\mathbf{h}'_1, \mathbf{y}_{C+1}) + L_{\tau, \beta}(w_1) |\ell(\mathbf{h}'_1, \mathbf{y}_{C+1}) - \ell(\mathbf{h}_1, \mathbf{y}_{C+1})| \right. \\ & \quad \left. + \sum_{i=2}^m \sigma_i L_{\tau, \beta}(w_i) \ell(\mathbf{h}_i, \mathbf{y}_{C+1}) + \sum_{i=2}^m \sigma_i L_{\tau, \beta}(w'_i) \ell(\mathbf{h}'_i, \mathbf{y}_{C+1}) \right] \\ &\leq \frac{1}{2} \mathbb{E}_{\sigma_2, \dots, \sigma_m} \left[ \sup_{\|w\|_K \leq B, \mathbf{h} \in \mathcal{H}} \sup_{\|w'\|_K \leq B, \mathbf{h}' \in \mathcal{H}} Lc|w_1 - w'_1| + (B + \beta) |\ell(\mathbf{h}'_1, \mathbf{y}_{C+1}) - \ell(\mathbf{h}_1, \mathbf{y}_{C+1})| \right. \\ & \quad \left. + \sum_{i=2}^m \sigma_i L_{\tau, \beta}(w_i) \ell(\mathbf{h}_i, \mathbf{y}_{C+1}) + \sum_{i=2}^m \sigma_i L_{\tau, \beta}(w'_i) \ell(\mathbf{h}'_i, \mathbf{y}_{C+1}) \right] \\ &= \mathbb{E}_{\sigma} \left[ \sup_{\|w\|_K \leq B, \mathbf{h} \in \mathcal{H}} Lc\sigma_1 w_1 + (B + \beta)\sigma_1 \ell(\mathbf{h}_1, \mathbf{y}_{C+1}) + \sum_{i=2}^m \sigma_i L_{\tau, \beta}(w_i) \ell(\mathbf{h}_i, \mathbf{y}_{C+1}) \right] \end{aligned}$$

Repeat the process  $m - 1$  times for  $i = 2, \dots, m$ .

$$\begin{aligned} &\leq \mathbb{E}_{\sigma} \left[ \sup_{\|w\|_K \leq B, \mathbf{h} \in \mathcal{H}} \sum_{i=1}^m Lc\sigma_i w_i + \sum_{i=1}^m (B + \beta)\sigma_i \ell(\mathbf{h}_i, \mathbf{y}_{C+1}) \right] \\ &\leq mLc\widehat{\mathfrak{R}}_T(\mathcal{H}_{K, B}) + m(B + \beta)\widehat{\mathfrak{R}}_T(\mathcal{F}), \end{aligned}$$

where  $w_i = w(\tilde{\mathbf{x}}_i)$ ,  $\mathbf{h}_i = \mathbf{h}(\tilde{\mathbf{x}}_i)$ ,  $L = \max\{1, \frac{\beta}{\tau}\}$ ,  $\mathcal{H}_{K,B} = \{w : w \in \mathcal{H}_K, \|w\|_K \leq B\}$  and  $\mathcal{F} = \{\ell(\mathbf{h}, \mathbf{y}_{C+1}) : \mathbf{h} \in \mathcal{H}\}$ .

According to Theorem 5.5 of (Mohri et al., 2012), we obtain that

$$\widehat{\mathfrak{R}}_T(\mathcal{H}_{K,B}) \leq B\sqrt{\frac{1}{m}}.$$

According to the proving process of Lemma 4, we obtain that

$$\widehat{\mathfrak{R}}_T(\mathcal{F}) \leq c\sqrt{\frac{4d \log m + 8d \log(C+1)}{m}},$$

where  $d$  is the Natarajan Dimension of  $\mathcal{H}$ .

Hence,

$$\widehat{\mathfrak{R}}_T(\mathcal{F}_B) \leq BLc\sqrt{\frac{1}{m}} + (B + \beta)c\sqrt{\frac{4d \log m + 8d \log(C+1)}{m}}.$$

This implies that for  $1 - 2\delta > 0$ , we have

$$\begin{aligned} & \sup_{w \in \mathcal{H}_K, \|w\|_K \leq B} \sup_{\mathbf{h} \in \mathcal{H}} \left| \frac{1}{m} \sum_{\mathbf{x} \in T} L_{\tau, \beta}(w(\mathbf{x})) \ell(\mathbf{h}(\mathbf{x}), \mathbf{y}_{C+1}) - \int_{\mathcal{X}} L_{\tau, \beta}(w(\mathbf{x})) \ell(\mathbf{h}(\mathbf{x}), \mathbf{y}_{C+1}) dU(\mathbf{x}) \right| \\ & \leq 2B \max\{1, \frac{\beta}{\tau}\} c\sqrt{\frac{1}{m}} + 2(B + \beta)c\sqrt{\frac{4d \log m + 8d \log(C+1)}{m}} + 4(B + \beta)c\sqrt{\frac{2 \log(4/\delta)}{m}}. \end{aligned} \quad (11)$$

Because  $\|\widehat{w}\|_K = O_p(1)$ , then combining inequality 11, we know that

$$\begin{aligned} & \sup_{\mathbf{h} \in \mathcal{H}} \left| \frac{1}{m} \sum_{\mathbf{x} \in T} L_{\tau, \beta}(\widehat{w}(\mathbf{x})) \ell(\mathbf{h}(\mathbf{x}), \mathbf{y}_{C+1}) - \int_{\mathcal{X}} L_{\tau, \beta}(w(\mathbf{x})) \ell(\mathbf{h}(\mathbf{x}), \mathbf{y}_{C+1}) dU(\mathbf{x}) \right| \\ & \leq 2O_p(1) \max\{1, \frac{\beta}{\tau}\} cO_p\left(\sqrt{\frac{1}{m}}\right) + 2(O_p(1) + \beta)cO_p\left(\sqrt{\frac{4d \log m + 8d \log(C+1)}{m}}\right) + 4(O_p(1) + \beta)cO_p\left(\sqrt{\frac{2 \log(4/\delta)}{m}}\right). \end{aligned}$$

This implies that

$$\sup_{\mathbf{h} \in \mathcal{H}} \left| \frac{1}{m} \sum_{\mathbf{x} \in T} L_{\tau, \beta}(\widehat{w}(\mathbf{x})) \ell(\mathbf{h}(\mathbf{x}), \mathbf{y}_{C+1}) - \int_{\mathcal{X}} L_{\tau, \beta}(w(\mathbf{x})) \ell(\mathbf{h}(\mathbf{x}), \mathbf{y}_{C+1}) dU(\mathbf{x}) \right| = c(\max\{1, \frac{\beta}{\tau}\} + \beta)O_p(\lambda_{n,m}^{\frac{1}{2}}).$$

**Step 4.** Using the results of Steps 1, 2 and 3, we have

$$\begin{aligned} & \sup_{\mathbf{h} \in \mathcal{H}} |R_Q(\mathbf{h}, \mathbf{y}_{C+1}) - \gamma \widehat{R}_T^{\tau, \beta}(\mathbf{h}, \mathbf{y}_{C+1})| \\ & \leq \sup_{\mathbf{h} \in \mathcal{H}} |R_Q(\mathbf{h}, \mathbf{y}_{C+1}) - \gamma R_U^{\tau, \beta}(\mathbf{h}, \mathbf{y}_{C+1})| + \sup_{\mathbf{h} \in \mathcal{H}} |\gamma R_U^{\tau, \beta}(\mathbf{h}, \mathbf{y}_{C+1}) - \gamma \int_{\mathcal{X}} L_{\tau, \beta}(\widehat{w}(\mathbf{x})) \ell(\mathbf{h}(\mathbf{x}), \mathbf{y}_{C+1}) dU(\mathbf{x})| \\ & \quad + \sup_{\mathbf{h} \in \mathcal{H}} \left| \gamma \int_{\mathcal{X}} L_{\tau, \beta}(\widehat{w}(\mathbf{x})) \ell(\mathbf{h}(\mathbf{x}), \mathbf{y}_{C+1}) dU(\mathbf{x}) - \gamma \widehat{R}_T^{\tau, \beta}(\mathbf{h}, \mathbf{y}_{C+1}) \right| \\ & \leq \gamma \beta cU(\{\mathbf{x} : 0 < r(\mathbf{x}) \leq 2\tau\}) + \gamma \max\{c, \frac{c\beta}{\tau}\} O_p(\lambda_{n,m}^{\frac{1}{2}}) + c(\max\{1, \frac{\beta}{\tau}\} + \beta) O_p(\lambda_{n,m}^{\frac{1}{2}}). \end{aligned}$$

Note that  $\gamma < 1$ , we can write

$$\sup_{\mathbf{h} \in \mathcal{H}} |R_Q(\mathbf{h}, \mathbf{y}_{C+1}) - \gamma \widehat{R}_T^{\tau, \beta}(\mathbf{h}, \mathbf{y}_{C+1})| \leq \gamma \beta cU(\{\mathbf{x} : 0 < r(\mathbf{x}) \leq 2\tau\}) + c(\max\{1, \frac{\beta}{\tau}\} + \beta) O_p(\lambda_{n,m}^{\frac{1}{2}}).$$

□

605 *Proof of Theorem 3.* We separate the proof into three steps.

606 **Step 1.** We claim that

$$607 \sup_{\mathbf{h} \in \mathcal{H}} |(1 - \alpha) \Delta_{S,T}^{\tau, \beta}(\mathbf{h}) - \max\{R_Q(\mathbf{h}, \mathbf{y}_{C+1}) - (1 - \alpha)R_{P,k}(\mathbf{h}, \mathbf{y}_{C+1}), 0\}|$$

$$608 \leq \gamma\beta cU(\{\mathbf{x} : 0 < r(\mathbf{x}) \leq 2\tau\}) + c(\max\{1, \frac{\beta}{\tau}\} + \beta)O_p(\lambda_{n,m}^{\frac{1}{2}}).$$

612 First, it is easy to check that

$$613 \sup_{\mathbf{h} \in \mathcal{H}} |(1 - \alpha) \Delta_{S,T}^{\tau, \beta}(\mathbf{h}) - \max\{R_Q(\mathbf{h}, \mathbf{y}_{C+1}) - (1 - \alpha)R_{P,k}(\mathbf{h}, \mathbf{y}_{C+1}), 0\}|$$

$$614 \leq \sup_{\mathbf{h} \in \mathcal{H}} |(1 - \alpha) \widehat{R}_T^{\tau, \beta}(\mathbf{h}, \mathbf{y}_{K+1}) - (1 - \alpha) \widehat{R}_S(\mathbf{h}, \mathbf{y}_{K+1}) - R_Q(\mathbf{h}, \mathbf{y}_{C+1}) + (1 - \alpha)R_{P,k}(\mathbf{h}, \mathbf{y}_{C+1})|$$

$$615 \leq \sup_{\mathbf{h} \in \mathcal{H}} |(1 - \alpha) \widehat{R}_T^{\tau, \beta}(\mathbf{h}, \mathbf{y}_{K+1}) - R_Q(\mathbf{h}, \mathbf{y}_{C+1})| + (1 - \alpha) \sup_{\mathbf{h} \in \mathcal{H}} |\widehat{R}_S(\mathbf{h}, \mathbf{y}_{K+1}) - R_{P,k}(\mathbf{h}, \mathbf{y}_{C+1})|$$

$$616 \leq \gamma\beta cU(\{\mathbf{x} : 0 < r(\mathbf{x}) \leq 2\tau\}) + c(\max\{1, \frac{\beta}{\tau}\} + \beta)O_p(\lambda_{n,m}^{\frac{1}{2}}) \quad \text{Use Lemma 5}$$

$$617 + (1 - \alpha) \sup_{\mathbf{h} \in \mathcal{H}} |\widehat{R}_S(\mathbf{h}, \mathbf{y}_{K+1}) - R_{P,k}(\mathbf{h}, \mathbf{y}_{C+1})|$$

$$618 \leq \gamma\beta cU(\{\mathbf{x} : 0 < r(\mathbf{x}) \leq 2\tau\}) + c(\max\{1, \frac{\beta}{\tau}\} + \beta)O_p(\lambda_{n,m}^{\frac{1}{2}})$$

$$619 + (1 - \alpha)cO_p(\lambda_{n,m}^{\frac{1}{2}}) \quad \text{Use Lemma 4.}$$

627 Hence, we can write

$$628 \sup_{\mathbf{h} \in \mathcal{H}} |(1 - \alpha) \Delta_{S,T}^{\tau, \beta}(\mathbf{h}) - \max\{R_Q(\mathbf{h}, \mathbf{y}_{C+1}) - (1 - \alpha)R_{P,k}(\mathbf{h}, \mathbf{y}_{C+1}), 0\}|$$

$$629 \leq \gamma\beta cU(\{\mathbf{x} : 0 < r(\mathbf{x}) \leq 2\tau\}) + c(\max\{1, \frac{\beta}{\tau}\} + \beta)O_p(\lambda_{n,m}^{\frac{1}{2}}).$$

634 **Step 2.**

$$635 \sup_{\mathbf{h} \in \mathcal{H}} |(1 - \alpha) \widehat{R}_S(\mathbf{h}) + (1 - \alpha) \Delta_{S,T}^{\tau, \beta}(\mathbf{h}) - (1 - \alpha)R_{P,k}(\mathbf{h}) - \max\{R_Q(\mathbf{h}, \mathbf{y}_{C+1}) - (1 - \alpha)R_{P,k}(\mathbf{h}, \mathbf{y}_{C+1}), 0\}|$$

$$636 \leq \sup_{\mathbf{h} \in \mathcal{H}} |(1 - \alpha) \widehat{R}_S(\mathbf{h}) - (1 - \alpha)R_{P,k}(\mathbf{h})| + \sup_{\mathbf{h} \in \mathcal{H}} |(1 - \alpha) \Delta_{S,T}^{\tau, \beta}(\mathbf{h}) - \max\{R_Q(\mathbf{h}, \mathbf{y}_{C+1}) - (1 - \alpha)R_{P,k}(\mathbf{h}, \mathbf{y}_{C+1}), 0\}|$$

$$637 \leq (1 - \alpha)cO_p(\lambda_{n,m}^{\frac{1}{2}}) \quad \text{Use Lemma 4}$$

$$638 + \gamma\beta cU(\{\mathbf{x} : 0 < r(\mathbf{x}) \leq 2\tau\}) + c(\max\{1, \frac{\beta}{\tau}\} + \beta)O_p(\lambda_{n,m}^{\frac{1}{2}}) \quad \text{Use the result of Step 1.}$$

643 Hence, we can write

$$644 \sup_{\mathbf{h} \in \mathcal{H}} |(1 - \alpha) \widehat{R}_S(\mathbf{h}) + (1 - \alpha) \Delta_{S,T}^{\tau, \beta}(\mathbf{h}) - (1 - \alpha)R_{P,k}(\mathbf{h}) - \max\{R_Q(\mathbf{h}, \mathbf{y}_{C+1}) - (1 - \alpha)R_{P,k}(\mathbf{h}, \mathbf{y}_{C+1}), 0\}|$$

$$645 \leq \gamma\beta cU(\{\mathbf{x} : 0 < r(\mathbf{x}) \leq 2\tau\}) + c(\max\{1, \frac{\beta}{\tau}\} + \beta)O_p(\lambda_{n,m}^{\frac{1}{2}}).$$

649 **Step 3.** Note that

$$650 R_Q^\alpha(\mathbf{h}) = (1 - \alpha)R_{P,k}(\mathbf{h}) + \max\{R_Q(\mathbf{h}, \mathbf{y}_{C+1}) - (1 - \alpha)R_{P,k}(\mathbf{h}, \mathbf{y}_{C+1}), 0\} \quad \text{Use Lemma 1.}$$

652 Hence,

$$653 \sup_{\mathbf{h} \in \mathcal{H}} |(1 - \alpha) \widehat{R}_S(\mathbf{h}) + (1 - \alpha) \Delta_{S,T}^{\tau, \beta}(\mathbf{h}) - R_Q^\alpha(\mathbf{h})|$$

$$654 \leq \gamma\beta cU(\{\mathbf{x} : 0 < r(\mathbf{x}) \leq 2\tau\}) + c(\max\{1, \frac{\beta}{\tau}\} + \beta)O_p(\lambda_{n,m}^{\frac{1}{2}}).$$

658 □

## 5. Appendix E: Proofs of Theorem 4, Theorem 5 and Theorem 6

### 5.1. Proof for Theorem

*Proof of Theorem 4.* According to Theorem 1, we know that for any  $\mathbf{h} \in \mathcal{H}$ ,

$$|R_P^\alpha(\mathbf{h}) - R_Q^\alpha(\mathbf{h})| \leq \alpha d_{\mathbf{h}, \mathcal{H}}^\ell(P_{X|Y=\mathbf{y}_{C+1}}, Q_{X|Y=\mathbf{y}_{C+1}}) + \alpha\Lambda. \quad (12)$$

According to Theorem 3, we know that for any  $\mathbf{h} \in \mathcal{H}$ ,

$$\begin{aligned} & |(1-\alpha)\widehat{R}_S(\mathbf{h}) + (1-\alpha)\Delta_{S,T}^{\tau,\beta}(\mathbf{h}) - R_Q^\alpha(\mathbf{h})| \\ & \leq \gamma\beta cU(\{\mathbf{x} : 0 < r(\mathbf{x}) \leq 2\tau\}) + c(\max\{1, \frac{\beta}{\tau}\} + \beta)O_p(\lambda_{n,m}^{\frac{1}{2}}). \end{aligned} \quad (13)$$

Combining inequalities (12) and (13), we know that for any  $\mathbf{h} \in \mathcal{H}$ ,

$$\begin{aligned} & |(1-\alpha)\widehat{R}_S(\mathbf{h}) + (1-\alpha)\Delta_{S,T}^{\tau,\beta}(\mathbf{h}) - R_P^\alpha(\mathbf{h})| \\ & \leq \gamma\beta cU(\{\mathbf{x} : 0 < r(\mathbf{x}) \leq 2\tau\}) + c(\max\{1, \frac{\beta}{\tau}\} + \beta)O_p(\lambda_{n,m}^{\frac{1}{2}}) + \alpha d_{\mathbf{h}, \mathcal{H}}^\ell(P_{X|Y=\mathbf{y}_{C+1}}, Q_{X|Y=\mathbf{y}_{C+1}}) + \alpha\Lambda. \end{aligned}$$

□

### 5.2. Proof for Theorem 5

*Proof of Theorem 5.* Assume that

$$\widehat{\mathbf{h}} \in \arg \min_{\mathbf{h} \in \mathcal{H}} \widehat{R}_{S,T}^{\tau,\beta}(\mathbf{h}), \quad \mathbf{h}_Q \in \arg \min_{\mathbf{h} \in \mathcal{H}} R_Q^\alpha(\mathbf{h}).$$

**Step 1.** It is easy to check that

$$\begin{aligned} R_Q^\alpha(\widehat{\mathbf{h}}) - R_Q^\alpha(\mathbf{h}_Q) &= R_Q^\alpha(\widehat{\mathbf{h}}) - (1-\alpha)\widehat{R}_{S,T}^{\tau,\beta}(\widehat{\mathbf{h}}) + (1-\alpha)\widehat{R}_{S,T}^{\tau,\beta}(\widehat{\mathbf{h}}) - R_Q^\alpha(\mathbf{h}_Q) \\ &\leq R_Q^\alpha(\widehat{\mathbf{h}}) - (1-\alpha)\widehat{R}_{S,T}^{\tau,\beta}(\widehat{\mathbf{h}}) + (1-\alpha)\widehat{R}_{S,T}^{\tau,\beta}(\mathbf{h}_Q) - R_Q^\alpha(\mathbf{h}_Q) \\ &\leq 2 \sup_{\mathbf{h} \in \mathcal{H}} |(1-\alpha)\widehat{R}_{S,T}^{\tau,\beta}(\mathbf{h}) - R_Q^\alpha(\mathbf{h})|, \end{aligned}$$

and

$$\begin{aligned} R_Q^\alpha(\widehat{\mathbf{h}}) - R_Q^\alpha(\mathbf{h}_Q) &= R_Q^\alpha(\widehat{\mathbf{h}}) - (1-\alpha)\widehat{R}_{S,T}^{\tau,\beta}(\mathbf{h}_Q) + (1-\alpha)\widehat{R}_{S,T}^{\tau,\beta}(\mathbf{h}_Q) - R_Q^\alpha(\mathbf{h}_Q) \\ &\geq R_Q^\alpha(\widehat{\mathbf{h}}) - (1-\alpha)\widehat{R}_{S,T}^{\tau,\beta}(\widehat{\mathbf{h}}) + (1-\alpha)\widehat{R}_{S,T}^{\tau,\beta}(\mathbf{h}_Q) - R_Q^\alpha(\mathbf{h}_Q) \\ &\geq -2 \sup_{\mathbf{h} \in \mathcal{H}} |(1-\alpha)\widehat{R}_{S,T}^{\tau,\beta}(\mathbf{h}) - R_Q^\alpha(\mathbf{h})|, \end{aligned}$$

which implies that

$$|R_Q^\alpha(\widehat{\mathbf{h}}) - R_Q^\alpha(\mathbf{h}_Q)| \leq 2 \sup_{\mathbf{h} \in \mathcal{H}} |(1-\alpha)\widehat{R}_{S,T}^{\tau,\beta}(\mathbf{h}) - R_Q^\alpha(\mathbf{h})|.$$

Using the result of Theorem 3, we obtain that

$$|R_Q^\alpha(\widehat{\mathbf{h}}) - R_Q^\alpha(\mathbf{h}_Q)| \leq 2c(\max\{1, \frac{\beta}{\tau}\} + \beta)O_p(\lambda_{n,m}^{\frac{1}{2}}) + 2\gamma c\beta U(0 < p/q \leq 2\tau). \quad (14)$$

Then, using the result of Step 3 in the proof of Theorem 2, we obtain that

$$|R_Q^\alpha(\widehat{\mathbf{h}}) - R_P^\alpha(\mathbf{h}_Q)| \leq 2c(\max\{1, \frac{\beta}{\tau}\} + \beta)O_p(\lambda_{n,m}^{\frac{1}{2}}) + 2\gamma c\beta U(0 < p/q \leq 2\tau). \quad (15)$$

Step 2.

$$\begin{aligned}
 \widehat{R}_{S,T}^{\tau,\beta}(\widehat{\mathbf{h}}) &= (1 - \alpha)\widehat{R}_S(\widehat{\mathbf{h}}) + (1 - \alpha)\Delta_{S,T}^{\tau,\beta}(\widehat{\mathbf{h}}) \\
 &\leq (1 - \alpha)\widehat{R}_S(\mathbf{h}_Q) + (1 - \alpha)\Delta_{S,T}^{\tau,\beta}(\mathbf{h}_Q) \\
 &\leq R_Q^\alpha(\mathbf{h}_Q) + c(\max\{1, \frac{\beta}{\tau}\} + \beta)O_p(\lambda_{n,m}^{\frac{1}{2}}) + \gamma c\beta U(0 < p/q \leq 2\tau) \text{ Using Theorem 3} \\
 &= (1 - \alpha)\min_{\mathbf{h} \in \mathcal{H}} R_{Q,k}(\mathbf{h}) + c(\max\{1, \frac{\beta}{\tau}\} + \beta)O_p(\lambda_{n,m}^{\frac{1}{2}}) + \gamma c\beta U(0 < p/q \leq 2\tau) \\
 &\text{Using the result of Step 3 in proof of Theorem 2 : } \min_{\mathbf{h} \in \mathcal{H}} R_Q^\alpha(\mathbf{h}) = (1 - \alpha)\min_{\mathbf{h} \in \mathcal{H}} R_{Q,k}(\mathbf{h}) \\
 &\leq (1 - \alpha)R_{Q,k}(\widehat{\mathbf{h}}) + c(\max\{1, \frac{\beta}{\tau}\} + \beta)O_p(\lambda_{n,m}^{\frac{1}{2}}) + \gamma c\beta U(0 < p/q \leq 2\tau).
 \end{aligned}$$

Hence,

$$\begin{aligned}
 &(1 - \alpha)\Delta_{S,T}^{\tau,\beta}(\widehat{\mathbf{h}}) \\
 &\leq (1 - \alpha)R_{Q,k}(\widehat{\mathbf{h}}) - (1 - \alpha)\widehat{R}_S(\widehat{\mathbf{h}}) + c(\max\{1, \frac{\beta}{\tau}\} + \beta)O_p(\lambda_{n,m}^{\frac{1}{2}}) + \gamma c\beta U(0 < p/q \leq 2\tau) \\
 &= (1 - \alpha)R_{P,k}(\widehat{\mathbf{h}}) - (1 - \alpha)\widehat{R}_S(\widehat{\mathbf{h}}) + c(\max\{1, \frac{\beta}{\tau}\} + \beta)O_p(\lambda_{n,m}^{\frac{1}{2}}) + \gamma c\beta U(0 < p/q \leq 2\tau) \\
 &\leq (1 - \alpha)cO_p(\lambda_{n,m}^{\frac{1}{2}}) + c(\max\{1, \frac{\beta}{\tau}\} + \beta)O_p(\lambda_{n,m}^{\frac{1}{2}}) + \gamma c\beta U(0 < p/q \leq 2\tau) \text{ Using the result of Lemma 4} \\
 &\leq 2c(\max\{1, \frac{\beta}{\tau}\} + \beta)O_p(\lambda_{n,m}^{\frac{1}{2}}) + \gamma c\beta U(0 < p/q \leq 2\tau).
 \end{aligned}$$

Then, combining above inequality with the result of Step 1 in the proof of Theorem 3, we obtain that

$$\begin{aligned}
 &\max\{R_Q(\widehat{\mathbf{h}}, \mathbf{y}_{C+1}) - (1 - \alpha)R_{P,k}(\widehat{\mathbf{h}}, \mathbf{y}_{C+1}), 0\} \\
 &\leq 3c(\max\{1, \frac{\beta}{\tau}\} + \beta)O_p(\lambda_{n,m}^{\frac{1}{2}}) + 2\gamma c\beta U(0 < p/q \leq 2\tau).
 \end{aligned}$$

Because  $\max\{R_Q(\widehat{\mathbf{h}}, \mathbf{y}_{C+1}) - (1 - \alpha)R_{P,k}(\widehat{\mathbf{h}}, \mathbf{y}_{C+1}), 0\} = \alpha R_{Q,u}(\widehat{\mathbf{h}})$ , we obtain that

$$\alpha R_{Q,u}(\widehat{\mathbf{h}}) \leq 3c(\max\{1, \frac{\beta}{\tau}\} + \beta)O_p(\lambda_{n,m}^{\frac{1}{2}}) + 2\gamma c\beta U(0 < p/q \leq 2\tau).$$

Step 3.

$$\begin{aligned}
 &|R_P^\alpha(\widehat{\mathbf{h}}) - R_P^\alpha(\mathbf{h}_Q)| \\
 &\leq |R_P^\alpha(\widehat{\mathbf{h}}) - R_Q^\alpha(\widehat{\mathbf{h}})| + |R_Q^\alpha(\widehat{\mathbf{h}}) - R_P^\alpha(\mathbf{h}_Q)| \\
 &= \alpha|R_{P,u}(\widehat{\mathbf{h}}) - R_{Q,u}(\widehat{\mathbf{h}})| + |R_Q^\alpha(\widehat{\mathbf{h}}) - R_P^\alpha(\mathbf{h}_Q)| \\
 &\leq \alpha R_{Q,u}(\widehat{\mathbf{h}}) + |R_Q^\alpha(\widehat{\mathbf{h}}) - R_P^\alpha(\mathbf{h}_Q)| \\
 &\leq 5c(\max\{1, \frac{\beta}{\tau}\} + \beta)O_p(\lambda_{n,m}^{\frac{1}{2}}) + 4\gamma c\beta U(0 < p/q \leq 2\tau) \text{ Using the results of Step 1 and Step 2.}
 \end{aligned}$$

Briefly, we can write (absorbing coefficient 5 into  $O_p$ )

$$|R_P^\alpha(\widehat{\mathbf{h}}) - R_P^\alpha(\mathbf{h}_Q)| \leq c(\max\{1, \frac{\beta}{\tau}\} + \beta)O_p(\lambda_{n,m}^{\frac{1}{2}}) + 4\gamma c\beta U(0 < p/q \leq 2\tau).$$

Combining above inequality with Theorem 2, we obtain that

$$|R_P^\alpha(\widehat{\mathbf{h}}) - \min_{\mathbf{h} \in \mathcal{H}} R_P^\alpha(\mathbf{h})| \leq c(\max\{1, \frac{\beta}{\tau}\} + \beta)O_p(\lambda_{n,m}^{\frac{1}{2}}) + 4\gamma c\beta U(0 < p/q \leq 2\tau).$$

□

## 5.3. Proof for Theorem 6

**Lemma 6.** Assume the feature space  $\mathcal{X}$  is compact and the loss function has an upper bound  $c$ . Let the RKHS  $\mathcal{H}_K$  is the Hilbert space with Gaussian kernel. Suppose that the real density  $p/q \in \mathcal{H}_K$  and set the regularization parameter  $\lambda = \lambda_{n,m}$  in KuLSIF such that

$$\lim_{n,m \rightarrow 0} \lambda_{n,m} = 0, \quad \lambda_{n,m}^{-1} = O(\min\{n, m\}^{1-\delta}),$$

where  $0 < \delta < 1$  is any constant, then

$$\sup_{\mathbf{h} \in \mathcal{H}} |R_{Q,u}(\mathbf{h}) - \gamma' \widehat{R}_{S,T,u}^{\tau,\beta}(\mathbf{h})| \leq \gamma' \beta c U(\{\mathbf{x} : 0 < r(\mathbf{x}) \leq 2\tau\}) + c(\max\{1, \frac{\beta}{\tau}\} + \beta) O_p(\lambda_{n,m}^{\frac{1}{2}}),$$

where  $\gamma' = 1/(\beta U(\{\mathbf{x} : r(\mathbf{x}) = 0\}))$ , and

$$R_{Q,u}(\mathbf{h}) = \int_{\mathcal{X}} \ell(\mathbf{h}(\mathbf{x}), \mathbf{y}_{C+1}) dQ_{X|Y=\mathbf{y}_{C+1}}(\mathbf{x}), \quad \widehat{R}_{S,T,u}^{\tau,\beta}(\mathbf{h}) := \frac{1}{m} \sum_{\mathbf{x} \in T} L_{\tau,\beta}(\widehat{w}(\mathbf{x})) \ell(\mathbf{h}(\mathbf{x}), \mathbf{y}_{C+1}),$$

here  $Q_{X,Y} := Q_U^{0,\beta} P_{Y|X}$ ,  $\widehat{w}$  is the solution of KuLSIF, and

$$L_{\tau,\beta}^-(x) = \begin{cases} x + \beta, & x \leq \tau; \\ 0, & 2\tau \leq x; \\ -\frac{\tau + \beta}{\tau}x + 2\tau + 2\beta, & \tau < x < 2\tau. \end{cases} \quad (16)$$

*Proof. Step 1.* We claim that

$$\sup_{\mathbf{h} \in \mathcal{H}} |R_{Q,u}(\mathbf{h}) - \gamma' R_{U,u}^{\tau,\beta}(\mathbf{h})| \leq \gamma' \beta c U(\{\mathbf{x} : 0 < r(\mathbf{x}) \leq 2\tau\}),$$

where

$$R_{U,u}^{\tau,\beta}(\mathbf{h}) = \int_{\mathcal{X}} L_{\tau,\beta}^-(r(\mathbf{x})) \ell(\mathbf{h}(\mathbf{x}), \mathbf{y}_{C+1}) dU(\mathbf{x}),$$

here  $r(\mathbf{x}) = p(\mathbf{x})/q(\mathbf{x})$ .

First, we note that

$$\begin{aligned} & \left| \int_{\mathcal{X}} L_{0,\beta}^-(r(\mathbf{x})) \ell(\mathbf{h}(\mathbf{x}), \mathbf{y}_{C+1}) dU(\mathbf{x}) - \int_{\mathcal{X}} L_{\tau,\beta}^-(r(\mathbf{x})) \ell(\mathbf{h}(\mathbf{x}), \mathbf{y}_{C+1}) dU(\mathbf{x}) \right| \\ & \leq \left| \int_{\mathcal{X}} L_{0,\beta}^-(r(\mathbf{x})) \ell(\mathbf{h}(\mathbf{x}), \mathbf{y}_{C+1}) dU(\mathbf{x}) - \int_{\mathcal{X}} L_{\tau,\beta}^-(r(\mathbf{x})) \ell(\mathbf{h}(\mathbf{x}), \mathbf{y}_{C+1}) dU(\mathbf{x}) \right| \\ & \leq c \int_{\mathcal{X}} |L_{0,\beta}^-(r(\mathbf{x})) - L_{\tau,\beta}^-(r(\mathbf{x}))| dU(\mathbf{x}) \\ & \leq c \int_{\{\mathbf{x} : 0 < r(\mathbf{x}) \leq 2\tau\}} (\tau + \beta) dU(\mathbf{x}) = (\tau + \beta) c U(\{\mathbf{x} : 0 < r(\mathbf{x}) \leq 2\tau\}). \end{aligned} \quad (17)$$

Because  $Q_{X,Y} = Q_U^{0,\beta} P_{Y|X}$ , then according to the definition of  $Q_U^{0,\beta}$ , we know

$$R_{Q,u}(\mathbf{h}) = \gamma' \int_{\mathcal{X}} L_{0,\beta}^-(r(\mathbf{x})) \ell(\mathbf{h}(\mathbf{x}), \mathbf{y}_{C+1}) dU(\mathbf{x}),$$

which implies

$$\sup_{\mathbf{h} \in \mathcal{H}} |R_{Q,u}(\mathbf{h}) - \gamma' R_{U,u}^{\tau,\beta}(\mathbf{h})| \leq \gamma' (\tau + \beta) c U(\{\mathbf{x} : 0 < r(\mathbf{x}) \leq 2\tau\}).$$

*Step 2.* We claim that

$$\sup_{\mathbf{h} \in \mathcal{H}} |R_{U,u}^{\tau,\beta}(\mathbf{h}) - \int_{\mathcal{X}} L_{\tau,\beta}^-(\widehat{w}(\mathbf{x})) \ell(\mathbf{h}(\mathbf{x}), \mathbf{y}_{C+1}) dU(\mathbf{x})| \leq (c + \frac{c\beta}{\tau}) O_p(\lambda_{n,m}^{\frac{1}{2}}).$$

First, the Lipschitz constant for  $L_{\tau,\beta}^-$  is smaller than  $1 + \frac{\beta}{\tau}$ .

Then,

$$\begin{aligned}
 & \sup_{\mathbf{h} \in \mathcal{H}} |R_{U,u}^{\tau,\beta}(\mathbf{h}) - \int_{\mathcal{X}} L_{\tau,\beta}^-(\widehat{w}(\mathbf{x}))\ell(\mathbf{h}(\mathbf{x}), \mathbf{y}_{C+1})dU(\mathbf{x})| \\
 &= \sup_{\mathbf{h} \in \mathcal{H}} \left| \int_{\mathcal{X}} L_{\tau,\beta}^-(r(\mathbf{x}))\ell(\mathbf{h}(\mathbf{x}), \mathbf{y}_{C+1})dU(\mathbf{x}) - \int_{\mathcal{X}} L_{\tau,\beta}^-(\widehat{w}(\mathbf{x}))\ell(\mathbf{h}(\mathbf{x}), \mathbf{y}_{C+1})dU(\mathbf{x}) \right| \\
 &\leq \sup_{\mathbf{h} \in \mathcal{H}} \int_{\mathcal{X}} |L_{\tau,\beta}^-(r(\mathbf{x})) - L_{\tau,\beta}^-(\widehat{w}(\mathbf{x}))|\ell(\mathbf{h}(\mathbf{x}), \mathbf{y}_{C+1})dU(\mathbf{x}) \\
 &\leq \sup_{\mathbf{h} \in \mathcal{H}} \sqrt{\int_{\mathcal{X}} |L_{\tau,\beta}^-(r(\mathbf{x})) - L_{\tau,\beta}^-(\widehat{w}(\mathbf{x}))|^2 dU(\mathbf{x})} \sqrt{\int_{\mathcal{X}} \ell^2(\mathbf{h}(\mathbf{x}), \mathbf{y}_{C+1})dU(\mathbf{x})} \quad \text{Hölder Inequality} \\
 &\leq c \sup_{\mathbf{h} \in \mathcal{H}} \sqrt{\int_{\mathcal{X}} |L_{\tau,\beta}^-(r(\mathbf{x})) - L_{\tau,\beta}^-(\widehat{w}(\mathbf{x}))|^2 dU(\mathbf{x})} \\
 &\leq (c + \frac{c\beta}{\tau}) \sup_{\mathbf{h} \in \mathcal{H}} \sqrt{\int_{\mathcal{X}} |r(\mathbf{x}) - \widehat{w}(\mathbf{x})|^2 dU(\mathbf{x})}.
 \end{aligned}$$

Lastly, using Lemma 2,

$$\sup_{\mathbf{h} \in \mathcal{H}} |R_{U,u}^{\tau,\beta}(\mathbf{h}) - \int_{\mathcal{X}} L_{\tau,\beta}^-(\widehat{w}(\mathbf{x}))\ell(\mathbf{h}(\mathbf{x}), \mathbf{y}_{C+1})dU(\mathbf{x})| \leq (c + \frac{c\beta}{\tau})O_p(\lambda_{n,m}^{\frac{1}{2}}).$$

**Step 3.** We claim that

$$\sup_{\mathbf{h} \in \mathcal{H}} \left| \frac{1}{m} \sum_{\mathbf{x} \in T} L_{\tau,\beta}^-(\widehat{w}(\mathbf{x}))\ell(\mathbf{h}(\mathbf{x}), \mathbf{y}_{C+1}) - \int_{\mathcal{X}} L_{\tau,\beta}^-(\widehat{w}(\mathbf{x}))\ell(\mathbf{h}(\mathbf{x}), \mathbf{y}_{C+1})dU(\mathbf{x}) \right| \leq c(1 + \frac{\beta}{\tau} + \beta)O_p(\lambda_{n,m}^{\frac{1}{2}}).$$

First, we set  $\mathcal{F}_B := \{L_{\tau,\beta}^-(w)\ell(\mathbf{h}, \mathbf{y}_{C+1}) : w \in \mathcal{H}_K, \|w\|_K \leq B, \mathbf{h} \in \mathcal{H}\}$ . We consider

$$\sup_{f \in \mathcal{F}_B} \left| \frac{1}{m} \sum_{\mathbf{x} \in T} f(\mathbf{x}) - \int_{\mathcal{X}} f(\mathbf{x})dU(\mathbf{x}) \right|$$

Using Lemma 3 and inequality 8, it is easy to check that for  $1 - 2\delta > 0$ , we have

$$\sup_{f \in \mathcal{F}_B} \left| \frac{1}{m} \sum_{\mathbf{x} \in T} f(\mathbf{x}) - \int_{\mathcal{X}} f(\mathbf{x})dU(\mathbf{x}) \right| \leq 2\widehat{\mathfrak{R}}_T(\mathcal{F}_B) + 4(\tau + \beta)c\sqrt{\frac{2\log(4/\delta)}{m}}, \quad (18)$$

here we have used  $|f| \leq (\tau + \beta)c$ , for any  $f \in \mathcal{F}_B$ .



Then, we consider  $\widehat{\mathfrak{R}}_T(\mathcal{F}_B)$ .

$$\begin{aligned}
 & m\widehat{\mathfrak{R}}_T(\mathcal{F}_B) \\
 &= \mathbb{E}_\sigma \left[ \sup_{\|w\|_K \leq B, \mathbf{h} \in \mathcal{H}} \sum_{i=1}^m \sigma_i L_{\tau, \beta}^-(w_i) \ell(\mathbf{h}_i, \mathbf{y}_{C+1}) \right] \\
 &= \mathbb{E}_\sigma \left[ \sup_{\|w\|_K \leq B, \mathbf{h} \in \mathcal{H}} \sigma_1 L_{\tau, \beta}^-(w_1) \ell(\mathbf{h}_1, \mathbf{y}_{C+1}) + \sum_{i=2}^m \sigma_i L_{\tau, \beta}^-(w_i) \ell(\mathbf{h}_i, \mathbf{y}_{C+1}) \right] \\
 &= \frac{1}{2} \mathbb{E}_{\sigma_2, \dots, \sigma_m} \left[ \sup_{\|w\|_K \leq B, \mathbf{h} \in \mathcal{H}} L_{\tau, \beta}^-(w_1) \ell(\mathbf{h}_1, \mathbf{y}_{C+1}) + \sum_{i=2}^m \sigma_i L_{\tau, \beta}^-(w_i) \ell(\mathbf{h}_i, \mathbf{y}_{C+1}) \right. \\
 &\quad \left. + \sup_{\|w\|_K \leq B, \mathbf{h} \in \mathcal{H}} -L_{\tau, \beta}^-(w_1) \ell(\mathbf{h}_1, \mathbf{y}_{C+1}) + \sum_{i=2}^m \sigma_i L_{\tau, \beta}^-(w_i) \ell(\mathbf{h}_i, \mathbf{y}_{C+1}) \right] \\
 &= \frac{1}{2} \mathbb{E}_{\sigma_2, \dots, \sigma_m} \left[ \sup_{\|w\|_K \leq B, \mathbf{h} \in \mathcal{H}} \sup_{\|w'\|_K \leq B, \mathbf{h}' \in \mathcal{H}} L_{\tau, \beta}^-(w_1) \ell(\mathbf{h}_1, \mathbf{y}_{C+1}) + \sum_{i=2}^m \sigma_i L_{\tau, \beta}^-(w_i) \ell(\mathbf{h}_i, \mathbf{y}_{C+1}) \right. \\
 &\quad \left. - L_{\tau, \beta}^-(w'_1) \ell(\mathbf{h}'_1, \mathbf{y}_{C+1}) + \sum_{i=2}^m \sigma_i L_{\tau, \beta}^-(w'_i) \ell(\mathbf{h}'_i, \mathbf{y}_{C+1}) \right] \\
 &\leq \frac{1}{2} \mathbb{E}_{\sigma_2, \dots, \sigma_m} \left[ \sup_{\|w\|_K \leq B, \mathbf{h} \in \mathcal{H}} \sup_{\|w'\|_K \leq B, \mathbf{h}' \in \mathcal{H}} |L_{\tau, \beta}^-(w_1) - L_{\tau, \beta}^-(w'_1)| \ell(\mathbf{h}'_1, \mathbf{y}_{C+1}) + L_{\tau, \beta}^-(w_1) |\ell(\mathbf{h}'_1, \mathbf{y}_{C+1}) - \ell(\mathbf{h}_1, \mathbf{y}_{C+1})| \right. \\
 &\quad \left. + \sum_{i=2}^m \sigma_i L_{\tau, \beta}^-(w_i) \ell(\mathbf{h}_i, \mathbf{y}_{C+1}) + \sum_{i=2}^m \sigma_i L_{\tau, \beta}^-(w'_i) \ell(\mathbf{h}'_i, \mathbf{y}_{C+1}) \right] \\
 &\leq \frac{1}{2} \mathbb{E}_{\sigma_2, \dots, \sigma_m} \left[ \sup_{\|w\|_K \leq B, \mathbf{h} \in \mathcal{H}} \sup_{\|w'\|_K \leq B, \mathbf{h}' \in \mathcal{H}} Lc|w_1 - w'_1| + (B + \beta) |\ell(\mathbf{h}'_1, \mathbf{y}_{C+1}) - \ell(\mathbf{h}_1, \mathbf{y}_{C+1})| \right. \\
 &\quad \left. + \sum_{i=2}^m \sigma_i L_{\tau, \beta}^-(w_i) \ell(\mathbf{h}_i, \mathbf{y}_{C+1}) + \sum_{i=2}^m \sigma_i L_{\tau, \beta}^-(w'_i) \ell(\mathbf{h}'_i, \mathbf{y}_{C+1}) \right] \\
 &= \mathbb{E}_\sigma \left[ \sup_{\|w\|_K \leq B, \mathbf{h} \in \mathcal{H}} Lc\sigma_1 w_1 + (B + \beta)\sigma_1 \ell(\mathbf{h}_1, \mathbf{y}_{C+1}) + \sum_{i=2}^m \sigma_i L_{\tau, \beta}^-(w_i) \ell(\mathbf{h}_i, \mathbf{y}_{C+1}) \right]
 \end{aligned}$$

Repeat the process  $m - 1$  times for  $i = 2, \dots, m$ .

$$\begin{aligned}
 &\leq \mathbb{E}_\sigma \left[ \sup_{\|w\|_K \leq B, \mathbf{h} \in \mathcal{H}} \sum_{i=1}^m Lc\sigma_i w_i + \sum_{i=1}^m (B + \beta)\sigma_i \ell(\mathbf{h}_i, \mathbf{y}_{C+1}) \right] \\
 &\leq mLc\widehat{\mathfrak{R}}_T(\mathcal{H}_{K, B}) + m(B + \beta)\widehat{\mathfrak{R}}_T(\mathcal{F}),
 \end{aligned}$$

where  $w_i = w(\tilde{\mathbf{x}}_i)$ ,  $\mathbf{h}_i = \mathbf{h}(\tilde{\mathbf{x}}_i)$ ,  $L = 1 + \frac{\beta}{\tau}$ ,  $\mathcal{H}_{K, B} = \{w : w \in \mathcal{H}_K, \|w\|_K \leq B\}$  and  $\mathcal{F} = \{\ell(\mathbf{h}, \mathbf{y}_{C+1}) : \mathbf{h} \in \mathcal{H}\}$ .

According to Theorem 5.5 of Mohri et al. (2012), we obtain that

$$\widehat{\mathfrak{R}}_T(\mathcal{H}_{K, B}) \leq B\sqrt{\frac{1}{m}}.$$

According to the proving process of Lemma 4, we obtain that

$$\widehat{\mathfrak{R}}_T(\mathcal{F}) \leq c\sqrt{\frac{4d \log m + 8d \log(C + 1)}{m}},$$

where  $d$  is the Natarajan Dimension of  $\mathcal{H}$ .

Hence,

$$\widehat{\mathfrak{R}}_T(\mathcal{F}_B) \leq BLc\sqrt{\frac{1}{m}} + (B + \beta)c\sqrt{\frac{4d \log m + 8d \log(C + 1)}{m}}.$$

This implies that for  $1 - 2\delta > 0$ , we have

$$\begin{aligned} & \sup_{w \in \mathcal{H}_K, \|w\|_K \leq B} \sup_{\mathbf{h} \in \mathcal{H}} \left| \frac{1}{m} \sum_{\mathbf{x} \in T} L_{\tau, \beta}^-(w(\mathbf{x})) \ell(\mathbf{h}(\mathbf{x}), \mathbf{y}_{C+1}) - \int_{\mathcal{X}} L_{\tau, \beta}^-(w(\mathbf{x})) \ell(\mathbf{h}(\mathbf{x}), \mathbf{y}_{C+1}) dU(\mathbf{x}) \right| \\ & \leq 2B \left(1 + \frac{\beta}{\tau}\right) c \sqrt{\frac{1}{m}} + 2(B + \beta) c \sqrt{\frac{4d \log m + 8d \log(C+1)}{m}} + 4(\tau + \beta) c \sqrt{\frac{2 \log(4/\delta)}{m}}. \end{aligned} \quad (19)$$

Because  $\|\widehat{w}\|_K = O_p(1)$ , then combining inequality 19, we know that

$$\begin{aligned} & \sup_{\mathbf{h} \in \mathcal{H}} \left| \frac{1}{m} \sum_{\mathbf{x} \in T} L_{\tau, \beta}^-(\widehat{w}(\mathbf{x})) \ell(\mathbf{h}(\mathbf{x}), \mathbf{y}_{C+1}) - \int_{\mathcal{X}} L_{\tau, \beta}^-(w(\mathbf{x})) \ell(\mathbf{h}(\mathbf{x}), \mathbf{y}_{C+1}) dU(\mathbf{x}) \right| \\ & \leq 2O_p(1) \left(1 + \frac{\beta}{\tau}\right) c O_p\left(\sqrt{\frac{1}{m}}\right) + 2(O_p(1) + \beta) c O_p\left(\sqrt{\frac{4d \log m + 8d \log(C+1)}{m}}\right) + 4(\tau + \beta) c O_p\left(\sqrt{\frac{2 \log(4/\delta)}{m}}\right). \end{aligned}$$

This implies that

$$\sup_{\mathbf{h} \in \mathcal{H}} \left| \frac{1}{m} \sum_{\mathbf{x} \in T} L_{\tau, \beta}^-(\widehat{w}(\mathbf{x})) \ell(\mathbf{h}(\mathbf{x}), \mathbf{y}_{C+1}) - \int_{\mathcal{X}} L_{\tau, \beta}^-(w(\mathbf{x})) \ell(\mathbf{h}(\mathbf{x}), \mathbf{y}_{C+1}) dU(\mathbf{x}) \right| \leq c \left(1 + \frac{\beta}{\tau} + \tau + \beta\right) O_p(\lambda_{n,m}^{\frac{1}{2}}).$$

**Step 4.** Using the results of Steps 1, 2 and 3, we have

$$\begin{aligned} & \sup_{\mathbf{h} \in \mathcal{H}} |R_{Q,u}(\mathbf{h}) - \gamma' \widehat{R}_{S,T,u}^{\tau, \beta}(\mathbf{h})| \\ & \leq \sup_{\mathbf{h} \in \mathcal{H}} |R_{Q,u}(\mathbf{h}) - \gamma' R_{U,u}^{\tau, \beta}(\mathbf{h})| + \sup_{\mathbf{h} \in \mathcal{H}} |\gamma' R_{U,u}^{\tau, \beta}(\mathbf{h}) - \gamma' \int_{\mathcal{X}} L_{\tau, \beta}^-(\widehat{w}(\mathbf{x})) \ell(\mathbf{h}(\mathbf{x})) dU(\mathbf{x})| \\ & \quad + \sup_{\mathbf{h} \in \mathcal{H}} \left| \gamma' \int_{\mathcal{X}} L_{\tau, \beta}^-(\widehat{w}(\mathbf{x})) \ell(\mathbf{h}(\mathbf{x}), \mathbf{y}_{C+1}) dU(\mathbf{x}) - \gamma' \widehat{R}_{S,T,u}^{\tau, \beta}(\mathbf{h}, \mathbf{y}_{C+1}) \right| \\ & \leq \gamma' \beta c U(\{\mathbf{x} : 0 < r(\mathbf{x}) \leq 2\tau\}) + \gamma' \left(c + \frac{c\beta}{\tau}\right) O_p(\lambda_{n,m}^{\frac{1}{2}}) + c\gamma' \left(1 + \frac{\beta}{\tau} + \tau + \beta\right) O_p(\lambda_{n,m}^{\frac{1}{2}}). \end{aligned}$$

We can write

$$\sup_{\mathbf{h} \in \mathcal{H}} |R_{Q,u}(\mathbf{h}) - \gamma' \widehat{R}_{S,T,u}^{\tau, \beta}(\mathbf{h})| \leq \gamma' \beta c U(\{\mathbf{x} : 0 < r(\mathbf{x}) \leq 2\tau\}) + c\gamma' \left(1 + \frac{\beta}{\tau} + \tau + \beta\right) O_p(\lambda_{n,m}^{\frac{1}{2}}).$$

□

Proof of Theorem 6. Assume that

$$\tilde{\mathbf{h}} \in \arg \min_{\mathbf{h} \in \mathcal{H}} \tilde{R}_{S,T}^{\tau,\beta}(\mathbf{h}), \quad \mathbf{h}_Q \in \arg \min_{\mathbf{h} \in \mathcal{H}} R_Q^\alpha(\mathbf{h}).$$

**Step 1.** It is easy to check that

$$\begin{aligned} R_Q^\alpha(\tilde{\mathbf{h}}) - R_Q^\alpha(\mathbf{h}_Q) &= R_Q^\alpha(\tilde{\mathbf{h}}) - \tilde{R}_{S,T}^{\tau,\beta}(\tilde{\mathbf{h}}) + \tilde{R}_{S,T}^{\tau,\beta}(\tilde{\mathbf{h}}) - R_Q^\alpha(\mathbf{h}_Q) \\ &\leq R_Q^\alpha(\tilde{\mathbf{h}}) - \tilde{R}_{S,T}^{\tau,\beta}(\tilde{\mathbf{h}}) + \tilde{R}_{S,T}^{\tau,\beta}(\mathbf{h}_Q) - R_Q^\alpha(\mathbf{h}_Q) \\ &\leq 2 \sup_{\mathbf{h} \in \mathcal{H}} |\tilde{R}_{S,T}^{\tau,\beta}(\mathbf{h}) - R_Q^\alpha(\mathbf{h})|, \end{aligned}$$

and

$$\begin{aligned} R_Q^\alpha(\tilde{\mathbf{h}}) - R_Q^\alpha(\mathbf{h}_Q) &= R_Q^\alpha(\tilde{\mathbf{h}}) - \tilde{R}_{S,T}^{\tau,\beta}(\mathbf{h}_Q) + \tilde{R}_{S,T}^{\tau,\beta}(\mathbf{h}_Q) - R_Q^\alpha(\mathbf{h}_Q) \\ &\geq R_Q^\alpha(\tilde{\mathbf{h}}) - \tilde{R}_{S,T}^{\tau,\beta}(\tilde{\mathbf{h}}) + \tilde{R}_{S,T}^{\tau,\beta}(\mathbf{h}_Q) - R_Q^\alpha(\mathbf{h}_Q) \\ &\geq -2 \sup_{\mathbf{h} \in \mathcal{H}} |\tilde{R}_{S,T}^{\tau,\beta}(\mathbf{h}) - R_Q^\alpha(\mathbf{h})|, \end{aligned}$$

which implies that

$$|R_Q^\alpha(\tilde{\mathbf{h}}) - R_Q^\alpha(\mathbf{h}_Q)| \leq 2 \sup_{\mathbf{h} \in \mathcal{H}} |\tilde{R}_{S,T}^{\tau,\beta}(\mathbf{h}) - R_Q^\alpha(\mathbf{h})|.$$

Using the result of Lemma 6 and Lemma 4, we obtain that

$$|R_Q^\alpha(\tilde{\mathbf{h}}) - R_Q^\alpha(\mathbf{h}_Q)| \leq 2c\gamma'(1 + \tau + \frac{\beta}{\tau} + \beta)O_p(\lambda_{n,m}^{\frac{1}{2}}) + 2\gamma'c\alpha\beta U(0 < p/q \leq 2\tau). \quad (20)$$

Then, using the result of Step 3 in the proof of Theorem 2, we obtain that

$$|R_Q^\alpha(\tilde{\mathbf{h}}) - R_P^\alpha(\mathbf{h}_Q)| \leq 2c\gamma'(1 + \tau + \frac{\beta}{\tau} + \beta)O_p(\lambda_{n,m}^{\frac{1}{2}}) + 2\gamma'c\alpha\beta U(0 < p/q \leq 2\tau). \quad (21)$$

**Step 2.**

$$\begin{aligned} \tilde{R}_{S,T}^{\tau,\beta}(\tilde{\mathbf{h}}) &= (1 - \alpha)\widehat{R}_S(\tilde{\mathbf{h}}) + \alpha\gamma'\widehat{R}_{S,T,u}^{\tau,\beta}(\tilde{\mathbf{h}}) \\ &\leq (1 - \alpha)\widehat{R}_S(\mathbf{h}_Q) + \alpha\gamma'\widehat{R}_{S,T,u}^{\tau,\beta}(\mathbf{h}_Q) \\ &\leq R_Q^\alpha(\mathbf{h}_Q) + c\gamma'(1 + \tau + \frac{\beta}{\tau} + \beta)O_p(\lambda_{n,m}^{\frac{1}{2}}) + \gamma'c\alpha\beta U(0 < p/q \leq 2\tau) \text{ Using Lemma 6 and Lemma 4} \\ &= (1 - \alpha) \min_{\mathbf{h} \in \mathcal{H}} R_{Q,k}(\mathbf{h}) + c\gamma'(1 + \tau + \frac{\beta}{\tau} + \beta)O_p(\lambda_{n,m}^{\frac{1}{2}}) + \gamma'c\alpha\beta U(0 < p/q \leq 2\tau) \\ &\text{Using the result of Step 3 in proof of Theorem 2 : } \min_{\mathbf{h} \in \mathcal{H}} R_Q^\alpha(\mathbf{h}) = (1 - \alpha) \min_{\mathbf{h} \in \mathcal{H}} R_{Q,k}(\mathbf{h}) \\ &\leq (1 - \alpha)R_{Q,k}(\tilde{\mathbf{h}}) + c\gamma'(1 + \tau + \frac{\beta}{\tau} + \beta)O_p(\lambda_{n,m}^{\frac{1}{2}}) + \gamma'c\alpha\beta U(0 < p/q \leq 2\tau). \end{aligned}$$

Hence,

$$\begin{aligned} &\alpha\gamma'\widehat{R}_{S,T,u}^{\tau,\beta}(\tilde{\mathbf{h}}) \\ &\leq (1 - \alpha)R_{Q,k}(\tilde{\mathbf{h}}) - (1 - \alpha)\widehat{R}_S(\tilde{\mathbf{h}}) + c\gamma'(1 + \tau + \frac{\beta}{\tau} + \beta)O_p(\lambda_{n,m}^{\frac{1}{2}}) + \gamma'c\alpha\beta U(0 < p/q \leq 2\tau) \\ &= (1 - \alpha)R_{P,k}(\tilde{\mathbf{h}}) - (1 - \alpha)\widehat{R}_S(\tilde{\mathbf{h}}) + c\gamma'(1 + \tau + \frac{\beta}{\tau} + \beta)O_p(\lambda_{n,m}^{\frac{1}{2}}) + \gamma'c\alpha\beta U(0 < p/q \leq 2\tau) \\ &\leq (1 - \alpha)cO_p(\lambda_{n,m}^{\frac{1}{2}}) + c\gamma'(1 + \tau + \frac{\beta}{\tau} + \beta)O_p(\lambda_{n,m}^{\frac{1}{2}}) + \gamma'c\alpha\beta U(0 < p/q \leq 2\tau) \text{ Using the result of Lemma 4} \\ &\leq 2c\gamma'(1 + \tau + \frac{\beta}{\tau} + \beta)O_p(\lambda_{n,m}^{\frac{1}{2}}) + \gamma'c\alpha\beta U(0 < p/q \leq 2\tau). \end{aligned}$$

1045 Then, combining the above inequality with the result of Lemma 6, we obtain that

$$1046 \alpha R_{Q,u}(\tilde{\mathbf{h}}) \leq 3c\gamma'(1 + \tau + \frac{\beta}{\tau} + \beta)O_p(\lambda_{n,m}^{\frac{1}{2}}) + 2\gamma'c\alpha\beta U(0 < p/q \leq 2\tau).$$

1049 **Step 3.**

$$1050 \begin{aligned} & |R_P^\alpha(\tilde{\mathbf{h}}) - R_P^\alpha(\mathbf{h}_Q)| \\ 1051 & \leq |R_P^\alpha(\tilde{\mathbf{h}}) - R_Q^\alpha(\tilde{\mathbf{h}})| + |R_Q^\alpha(\tilde{\mathbf{h}}) - R_P^\alpha(\mathbf{h}_Q)| \\ 1052 & = \alpha |R_{P,u}(\tilde{\mathbf{h}}) - R_{Q,u}^\alpha(\tilde{\mathbf{h}})| + |R_Q^\alpha(\tilde{\mathbf{h}}) - R_P^\alpha(\mathbf{h}_Q)| \\ 1053 & \leq \alpha R_{Q,u}(\tilde{\mathbf{h}}) + |R_Q^\alpha(\tilde{\mathbf{h}}) - R_P^\alpha(\mathbf{h}_Q)| \\ 1054 & \leq 5c\gamma'(1 + \tau + \frac{\beta}{\tau} + \beta)O_p(\lambda_{n,m}^{\frac{1}{2}}) + 4\gamma'c\alpha\beta U(0 < p/q \leq 2\tau) \end{aligned}$$

1055 Using the results of Step 1 and Step 2.

1056 Briefly, we can write (absorbing coefficient 5 into  $O_p$ )

$$1057 |R_P^\alpha(\tilde{\mathbf{h}}) - R_P^\alpha(\mathbf{h}_Q)| \leq c\gamma'(1 + \tau + \frac{\beta}{\tau} + \beta)O_p(\lambda_{n,m}^{\frac{1}{2}}) + 4\gamma'c\alpha\beta U(0 < p/q \leq 2\tau).$$

1058 Combining the above inequality with Theorem 2, we obtain that

$$1059 |R_P^\alpha(\tilde{\mathbf{h}}) - \min_{\mathbf{h} \in \mathcal{H}} R_P^\alpha(\mathbf{h})| \leq c\gamma'(1 + \tau + \frac{\beta}{\tau} + \beta)O_p(\lambda_{n,m}^{\frac{1}{2}}) + 4\gamma'c\alpha\beta U(0 < p/q \leq 2\tau).$$

□

1060  
1061  
1062  
1063  
1064  
1065  
1066  
1067  
1068  
1069  
1070  
1071  
1072  
1073  
1074  
1075  
1076  
1077  
1078  
1079  
1080  
1081  
1082  
1083  
1084  
1085  
1086  
1087  
1088  
1089  
1090  
1091  
1092  
1093  
1094  
1095  
1096  
1097  
1098  
1099

## 6. Appendix F: Details on Experiments

### 6.1. Datasets

• MNIST dataset (LeCun & Cortes, 2010). The MNIST<sup>1</sup> database of handwritten digits, has a training set of 60,000 samples, and a testing set of 10,000 samples. The digits have been size-normalized and centered in a fixed-size image. Following the set up in Yoshihashi et al. (2019), we use MNIST (LeCun & Cortes, 2010) as the training samples and use Omniglot (Ager, 2008), MNIST-Noise, and Noise these datasets as unknown classes. Omniglot contains alphabet characters. Noise is synthesized by sampling each pixel value from a uniform distribution on  $[0, 1]$  (i.i.d). MNIST-Noise is synthesized by adding noise on MNIST testing samples. Each dataset has 10,000 testing samples.

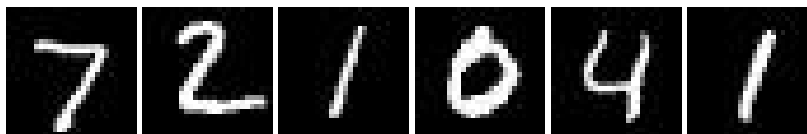

Figure 1. MNIST.

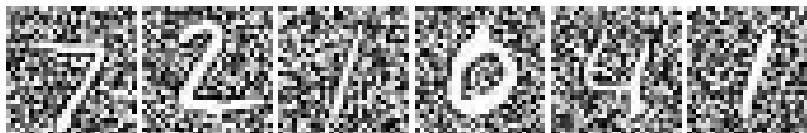

Figure 2. MNIST-Noise.

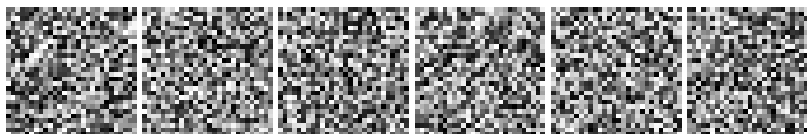

Figure 3. Noise.

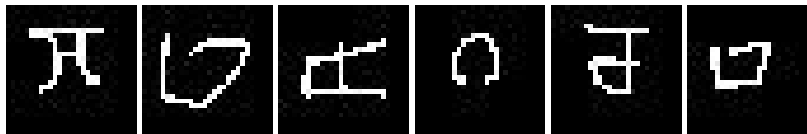

Figure 4. Omniglot.

Table 2. Introduction of MNIST Dataset in Open-set learning.

| Dataset     | #Sample | #Class | Known/Unknown   | Train/Test |
|-------------|---------|--------|-----------------|------------|
| MNIST       | 60,000  | 10     | Known Classes   | Train      |
| MNIST       | 10,000  | 10     | Known Classes   | Test       |
| MNIST-Noise | 10,000  | 10     | Unknown Classes | Test       |
| Omniglot    | 10,000  | 1,623  | Unknown Classes | Test       |
| Noise       | 10,000  | 1      | Unknown Classes | Test       |

<sup>1</sup><http://yann.lecun.com/exdb/mnist/>

Table 3. Introduction of CIFAR-10 Dataset in Open-set learning.

| Dataset         | #Sample | #Class | Known/Unknown   | Train/Test |
|-----------------|---------|--------|-----------------|------------|
| CIFAR-10        | 50,000  | 10     | Known Classes   | Train      |
| CIFAR-10        | 10,000  | 10     | Known Classes   | Test       |
| ImageNet-crop   | 10,000  | 1,000  | Unknown Classes | Test       |
| ImageNet-resize | 10,000  | 1,000  | Unknown Classes | Test       |
| LSUN-crop       | 10,000  | 10     | Unknown Classes | Test       |
| LSUN-resize     | 10,000  | 10     | Unknown Classes | Test       |

• CIFAR-10 dataset. The CIFAR-10 dataset consists of 60,000  $32 \times 32$  colour images in 10 classes, with 6,000 images per class. There are 50,000 training images and 10,000 testing images. Following the set up in Yoshihashi et al. (2019), we use the training samples from CIFAR-10 (Krizhevsky & Hinton, 2009) as training samples in open-set learning problem. We collect unknown samples from datasets ImageNet and LSUN. Similar to Yoshihashi et al. (2019), we resized or cropped them so that they would have the same sizes with known samples. Hence, we generated four datasets ImageNet-crop, ImageNet-resize, LSUN-crop and LSUN-resize as unknown classes.

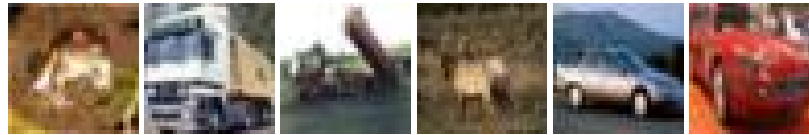

Figure 5. CIFAR-10.

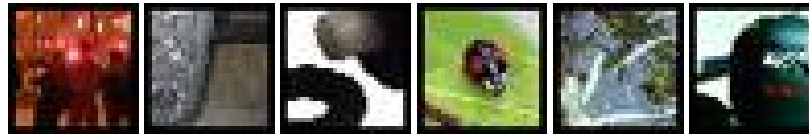

Figure 6. ImageNet-crop.

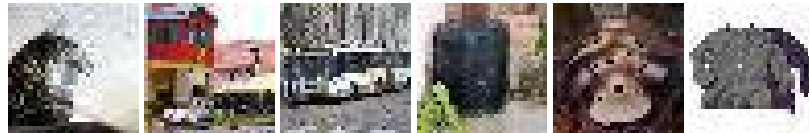

Figure 7. ImageNet-resize.

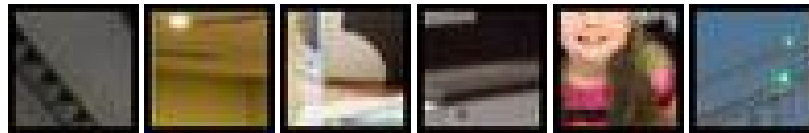

Figure 8. LSUN-crop.

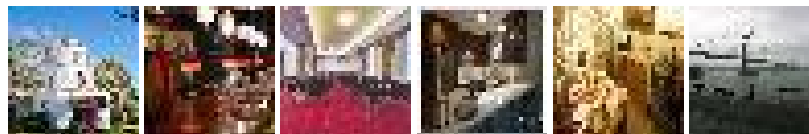

Figure 9. LSUN-resize.

## 6.2. Network Architecture and Experimental Setup

All details can be found in [github.com/Anjin-Liu/Openset\\_Learning\\_AOSR](https://github.com/Anjin-Liu/Openset_Learning_AOSR).

## 6.3. Parameter Analysis and Influence of Model Capacity

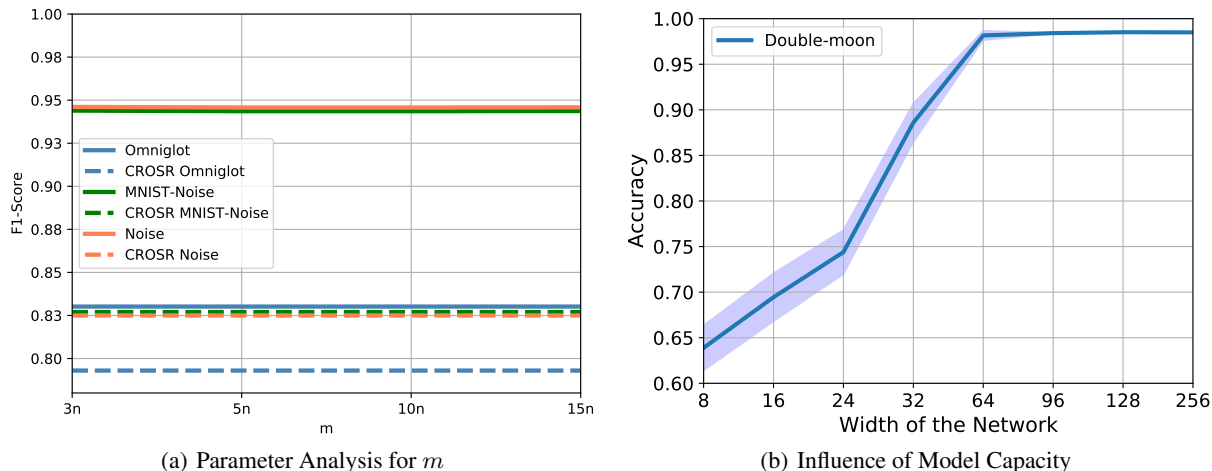

Figure 10. Parameter Analysis and Influence of Model Capacity

Experiment results on parameter  $m$  are shown in Figure 10 (a).  $m$  is the size of generated samples  $T$ . We set  $m = 3n, 5n, 10n$  and  $15n$ . By changing  $m$  in the range of  $3n, 5n, 10n, 15n$ , AOSR achieves consistent performance. This result can be explained by our theory. Because when  $m > n$ , the increases of  $m$  does not influence the error bound in Theorem 6.

Experiment results on the width of the network are shown in Figure 10 (b). We generate 2,000 training samples and adjust the width for the second to the last layer from 8 to 256. For different width, we run 100 times and report the mean accuracy and standard error. As increasing the network’s width from 8 to 256, the accuracy of double-moon increases. When the width is larger than 64, the performance achieves a stable performance. This means the model capacity has a profound impact on the performance of OSL. Generally, the larger the model capacity is, the better the model’s performance is. This is because a larger hypothesis space  $\mathcal{H}$  has a greater possibility to meet the conditions of Assumption 1 (realization assumption for unknown classes).

## References

- Ager, S. Omniglot-writing systems and languages of the world. *Retrieved January, 27:2008, 2008*.
- Kanamori, T., Suzuki, T., and Sugiyama, M. Condition number analysis of kernel-based density ratio estimation. *Technical Report TR09-0006, Department of Computer Science, Tokyo Institute of Technology, 2009*.
- Kanamori, T., Suzuki, T., and Sugiyama, M. Statistical analysis of kernel-based least-squares density-ratio estimation. *Mach. Learn.*, pp. 335–367, 2012.
- Krizhevsky, A. and Hinton, G. Convolutional deep belief networks on cifar-10. *Technical report, Citeseer, 2009*.
- LeCun, Y. and Cortes, C. MNIST handwritten digit database. 2010.
- Mohri, M., Rostamizadeh, A., and Talwalkar, A. *Foundations of Machine Learning*. 2012.
- Shalev-Shwartz, S. and Ben-David, S. Understanding machine learning: From theory to algorithms. In *Cambridge university press*, 2014.
- Yoshihashi, R., Shao, W., Kawakami, R., You, S., Iida, M., and Naemura, T. Classification-reconstruction learning for open-set recognition. In *CVPR*, pp. 4016–4025, 2019.
